# Supplementary material
Source: PubMed Central journal article supplement (PMC5350783)
Supplement: CTS-2-41_001.pdf [file CTS-2-41_001.pdf]

**Supplemental Material-Table 1. Apoptosis-related genes examined in the microarray experiments.**

| #  | Accession | Gene Name                                                                                                       | Gene Symbol      | Present* |
|----|-----------|-----------------------------------------------------------------------------------------------------------------|------------------|----------|
| 1  | BF417479  | 24-dehydrocholesterol reductase                                                                                 | Dhcr24           | Yes      |
| 2  | NM_022225 | 5-hydroxytryptamine (serotonin) receptor 1B                                                                     | Ets1             | No       |
| 3  | NM_030870 | 8-oxoguanine DNA-glycosylase 1                                                                                  | Ogg1             | Yes      |
| 4  | NM_020306 | a disintegrin and metalloproteinase domain 17 (tumor necrosis factor, alpha, converting enzyme)                 | Adam17           | Yes      |
| 5  | NM_131911 | acidic nuclear phosphoprotein 32 family, member B                                                               | Anp32b           | Yes      |
| 6  | NM_012912 | activating transcription factor 3                                                                               | Atf3             | Yes      |
| 7  | BM391471  | activating transcription factor 5                                                                               | Atf5             | Yes      |
| 8  | NM_019361 | activity regulated cytoskeletal-associated protein                                                              | Arc              | No       |
| 9  | AI600029  | activity-dependent neuroprotective protein                                                                      | Adnp             | Yes      |
| 10 | NM_017155 | adenosine A1 receptor                                                                                           | Adora1           | No       |
| 11 | AF228684  | adenosine A2a receptor                                                                                          | Adora2a          | Yes      |
| 12 | NM_012896 | adenosine A3 receptor                                                                                           | Adora3           | No       |
| 13 | NM_031006 | adenosine deaminase, RNA-specific                                                                               | Adar             | Yes      |
| 14 | AW523747  | adhesion molecule with Ig like domain 2                                                                         | Amigo2           | Yes      |
| 15 | U07126    | adrenergic receptor, alpha 1a                                                                                   | Adra1c           | No       |
| 16 | AY057895  | adrenergic receptor, beta 2                                                                                     | Adrb2            | Yes      |
| 17 | NM_012715 | adrenomedullin                                                                                                  | Adm              | Yes      |
| 18 | NM_134326 | albumin                                                                                                         | Alb              | Yes      |
| 19 | NM_022407 | aldehyde dehydrogenase family 1, member A1                                                                      | Aldh1a1          | Yes      |
| 20 | NM_012498 | aldo-keto reductase family 1, member B4 (aldose reductase)                                                      | Akr1b4           | Yes      |
| 21 | NM_017196 | allograft inflammatory factor 1                                                                                 | Aif1             | Yes      |
| 22 | NM_012493 | alpha-fetoprotein                                                                                               | Afp              | No       |
| 23 | NM_012892 | amiloride-sensitive cation channel 1, neuronal (degenerin)                                                      | Accn1            | No       |
| 24 | BM986220  | amyloid beta (A4) precursor protein                                                                             | App              | Yes      |
| 25 | NM_053957 | amyloid beta (A4) precursor protein-binding, family B, member 3                                                 | Apbb3            | Yes      |
| 26 | U90829    | amyloid beta precursor protein binding protein 1                                                                | Appbp1           | Yes      |
| 27 | NM_012502 | androgen receptor                                                                                               | Ar               | Yes      |
| 28 | AF275151  | androgen receptor-related apoptosis-associated protein CBL27                                                    | Cbl27            | Yes      |
| 29 | BI275292  | angiopoietin 2                                                                                                  | Angpt2           | No       |
| 30 | AA818262  | angiopoietin-like 4                                                                                             | Angptl4          | Yes      |
| 31 | AF201331  | angiotensin I converting enzyme (peptidyl-dipeptidase A) 1                                                      | Ace              | Yes      |
| 32 | BF552873  | angiotensin II receptor, type 2                                                                                 | Agtr2            | No       |
| 33 | NM_031009 | angiotensin receptor 1b                                                                                         | Agtr1b           | No       |
| 34 | NM_134432 | angiotensinogen (serpin peptidase inhibitor, clade A, member 8)                                                 | Agt              | Yes      |
| 35 | AJ428573  | ankyrin 3, epithelial                                                                                           | Ank3             | Yes      |
| 36 | L81174    | ankyrin repeat domain 1 (cardiac muscle)                                                                        | Ankrd1           | Yes      |
| 37 | NM_012904 | annexin A1                                                                                                      | Anxa1            | Yes      |
| 38 | NM_024155 | annexin A4                                                                                                      | Anxa4            | Yes      |
| 39 | NM_013132 | annexin A5                                                                                                      | Anxa5            | Yes      |
| 40 | BI275921  | anterior pharynx defective 1a homolog (C. elegans)                                                              | Aph1a            | No       |
| 41 | NM_133400 | apobec-1 complementation factor                                                                                 | Acf              | No       |
| 42 | J02582    | apolipoprotein E                                                                                                | ApoE             | Yes      |
| 43 | NM_053720 | apoptosis antagonizing transcription factor                                                                     | Aatf             | Yes      |
| 44 | AI233249  | apoptosis inhibitor 5 (predicted)                                                                               | Api5_predicted   | No       |
| 45 | AW144082  | Apoptosis, caspase activation inhibitor (predicted)                                                             | Aven_predicted   | No       |
| 46 | AA894233  | apoptosis-inducing factor (AIF)-like mitochondrion-associated inducer of death (predicted)                      | Amid_predicted   | Yes      |
| 47 | BE116857  | apoptotic chromatin condensation inducer 1                                                                      | Acin1            | Yes      |
| 48 | AF218388  | apoptotic peptidase activating factor 1                                                                         | Apaf1            | Yes      |
| 49 | L07268    | aquaporin 1                                                                                                     | Aqp1             | Yes      |
| 50 | NM_019158 | aquaporin 8                                                                                                     | Aqp8             | Yes      |
| 51 | NM_031010 | arachidonate 15-lipoxygenase                                                                                    | Alox15           | Yes      |
| 52 | BF285345  | arrestin, beta 2                                                                                                | Arrb2            | Yes      |
| 53 | NM_013149 | aryl hydrocarbon receptor                                                                                       | Ahr              | Yes      |
| 54 | NM_012780 | aryl hydrocarbon receptor nuclear translocator                                                                  | Arnt             | No       |
| 55 | NM_021590 | aryl hydrocarbon receptor-interacting protein-like 1                                                            | Aip1             | No       |
| 56 | BI274345  | ataxin 10                                                                                                       | Atxn10           | Yes      |
| 57 | NM_058213 | ATPase, Ca <sup>++</sup> transporting, cardiac muscle, fast twitch 1                                            | Atp2a1           | Yes      |
| 58 | J04024    | ATPase, Ca <sup>++</sup> transporting, cardiac muscle, slow twitch 2                                            | Atp2a2           | Yes      |
| 59 | AY082609  | ATP-binding cassette, sub-family B (MDR/TAP), member 1/ ATP-binding cassette, sub-family B (MDR/TAP), member 1A | Abcb1 /// Abcb1a | Yes      |
| 60 | NM_017228 | atrophin 1                                                                                                      | Atn1             | Yes      |
| 61 | AI169001  | autophagy-related 12 (yeast)                                                                                    | Atg12            | Yes      |
| 62 | AI406520  | AXL receptor tyrosine kinase                                                                                    | Axl              | Yes      |

|     |           |                                                                                                                                           |                                                                                                                       |     |
|-----|-----------|-------------------------------------------------------------------------------------------------------------------------------------------|-----------------------------------------------------------------------------------------------------------------------|-----|
| 63  | NM_021752 | baculoviral IAP repeat-containing 2                                                                                                       | Birc2                                                                                                                 | Yes |
| 64  | NM_023987 | baculoviral IAP repeat-containing 3                                                                                                       | Birc3                                                                                                                 | Yes |
| 65  | AF304333  | baculoviral IAP repeat-containing 4                                                                                                       | Birc4                                                                                                                 | No  |
| 66  | NM_022274 | baculoviral IAP repeat-containing 5                                                                                                       | Birc5                                                                                                                 | Yes |
| 67  | NM_031328 | B-cell CLL/lymphoma 10                                                                                                                    | Bcl10                                                                                                                 | Yes |
| 68  | NM_016993 | B-cell leukemia/lymphoma 2                                                                                                                | Bcl2                                                                                                                  | Yes |
| 69  | NM_133416 | B-cell leukemia/lymphoma 2 related protein A1                                                                                             | Bcl2a1                                                                                                                | Yes |
| 70  | AI172204  | B-cell receptor-associated protein 29                                                                                                     | Bcap29                                                                                                                | Yes |
| 71  | AI409930  | B-cell receptor-associated protein 31                                                                                                     | Bcap31                                                                                                                | Yes |
| 72  | NM_017258 | B-cell translocation gene 1, anti-proliferative                                                                                           | Btg1                                                                                                                  | Yes |
| 73  | BI288701  | B-cell translocation gene 2, anti-proliferative                                                                                           | Btg2                                                                                                                  | Yes |
| 74  | NM_139258 | Bcl2 modifying factor                                                                                                                     | Bmf                                                                                                                   | No  |
| 75  | NM_053420 | BCL2/adenovirus E1B 19 kDa-interacting protein 3                                                                                          | Bnip3                                                                                                                 | Yes |
| 76  | NM_080888 | BCL2/adenovirus E1B 19 kDa-interacting protein 3-like                                                                                     | Bnip3l                                                                                                                | Yes |
| 77  | NM_080897 | BCL2/adenovirus E1B 19kDa-interacting protein 1                                                                                           | Bnip1                                                                                                                 | Yes |
| 78  | AI178277  | BCL2/adenovirus E1B 19kDa-interacting protein 1, NIP2 (predicted)                                                                         | Bnip2_predicted                                                                                                       | Yes |
| 79  | NM_053812 | BCL2-antagonist/killer 1                                                                                                                  | Bak1                                                                                                                  | Yes |
| 80  | BI280304  | Bcl2-associated athanogene 1 (predicted)                                                                                                  | Bag1_predicted                                                                                                        | Yes |
| 81  | AI231792  | Bcl2-associated athanogene 3                                                                                                              | Bag3                                                                                                                  | Yes |
| 82  | BI282898  | BCL2-associated athanogene 5                                                                                                              | Bag5                                                                                                                  | No  |
| 83  | AF279911  | bcl2-associated death promoter                                                                                                            | Bad                                                                                                                   | No  |
| 84  | AI717547  | BCL2-associated transcription factor 1                                                                                                    | Bclaf1                                                                                                                | Yes |
| 85  | AF235993  | Bcl2-associated X protein                                                                                                                 | Bax                                                                                                                   | Yes |
| 86  | U72350    | Bcl2-like 1                                                                                                                               | Bcl2l1                                                                                                                | Yes |
| 87  | NM_053733 | Bcl2-like 10                                                                                                                              | Bcl2l10                                                                                                               | No  |
| 88  | NM_022612 | BCL2-like 11 (apoptosis facilitator)                                                                                                      | Bcl2l11                                                                                                               | Yes |
| 89  | AI227978  | BCL2-like 12 (proline rich) (predicted)                                                                                                   | Bcl2l12_predicted                                                                                                     | Yes |
| 90  | AA892271  | BCL2-like 13 (apoptosis facilitator) (predicted)                                                                                          | Bcl2l13_predicted                                                                                                     | Yes |
| 91  | NM_021850 | Bcl2-like 2                                                                                                                               | Bcl2l2                                                                                                                | No  |
| 92  | AF051093  | Bcl-2-related ovarian killer protein                                                                                                      | Bok                                                                                                                   | Yes |
| 93  | NM_053739 | beclin 1 (coiled-coil, myosin-like BCL2-interacting protein)                                                                              | Becn1                                                                                                                 | Yes |
| 94  | AI008680  | benzodiazepine receptor, peripheral                                                                                                       | Bzrp                                                                                                                  | Yes |
| 95  | NM_057130 | BH3 interacting (with BCL2 family) domain, apoptosis agonist                                                                              | Bid3                                                                                                                  | No  |
| 96  | AF136282  | BH3 interacting domain death agonist                                                                                                      | Bid                                                                                                                   | Yes |
| 97  | AI177631  | bifunctional apoptosis regulator                                                                                                          | Bfar                                                                                                                  | Yes |
| 98  | NM_012827 | bone morphogenetic protein 4                                                                                                              | Bmp4                                                                                                                  | Yes |
| 99  | BE118651  | bone morphogenic protein receptor, type II (serine/threonine kinase)                                                                      | Bmpr2                                                                                                                 | Yes |
| 100 | AA851481  | brain and reproductive organ-expressed protein                                                                                            | Bre                                                                                                                   | Yes |
| 101 | X67108    | brain derived neurotrophic factor                                                                                                         | Bdnf                                                                                                                  | Yes |
| 102 | AI169085  | brain zinc finger protein                                                                                                                 | Zfp179                                                                                                                | No  |
| 103 | NM_017253 | branched chain aminotransferase 1, cytosolic                                                                                              | Bcat1                                                                                                                 | Yes |
| 104 | NM_022622 | BRCA1 associated RING domain 1                                                                                                            | Bard1                                                                                                                 | No  |
| 105 | BF404972  | Breast cancer 1                                                                                                                           | Brcal                                                                                                                 | No  |
| 106 | NM_012931 | breast cancer anti-estrogen resistance 1                                                                                                  | Bcar1                                                                                                                 | Yes |
| 107 | NM_134413 | BTB (POZ) domain containing 14B                                                                                                           | Btbd14b                                                                                                               | No  |
| 108 | NM_031334 | cadherin 1                                                                                                                                | Cdh1                                                                                                                  | Yes |
| 109 | NM_019161 | cadherin 22                                                                                                                               | Cdh22                                                                                                                 | Yes |
| 110 | AF061947  | calcineurin binding protein 1                                                                                                             | Cabin1                                                                                                                | Yes |
| 111 | BM958511  | calcium binding protein p22                                                                                                               | Chp                                                                                                                   | Yes |
| 112 | AB070350  | calcium binding protein p22 /// similar to calcium binding protein P22 (predicted) /// similar to calcium binding protein P22 (predicted) | RGD1565588_predicted<br>///<br>RGD1564956_predicted<br>Chp ///<br>RGD1565588_predicted<br>///<br>RGD1564956_predicted | Yes |
| 113 | BF404381  | Calcium/calmodulin-dependent protein kinase II, alpha                                                                                     |                                                                                                                       | No  |
| 114 | NM_016996 | calcium-sensing receptor                                                                                                                  | Casr                                                                                                                  | No  |
| 115 | NM_019152 | calpain 1                                                                                                                                 | Capn1                                                                                                                 | Yes |
| 116 | NM_053295 | calpastatin                                                                                                                               | Cast                                                                                                                  | Yes |
| 117 | NM_022399 | calreticulin                                                                                                                              | Calr                                                                                                                  | Yes |
| 118 | NM_032462 | Calsenilin, presenilin binding protein, EF hand transcription factor                                                                      | Csen                                                                                                                  | Yes |
| 119 | NM_031017 | cAMP responsive element binding protein 1                                                                                                 | Creb1                                                                                                                 | No  |
| 120 | NM_017334 | cAMP responsive element modulator                                                                                                         | Crem                                                                                                                  | Yes |
| 121 | NM_012784 | cannabinoid receptor 1 (brain)                                                                                                            | Cnr1                                                                                                                  | No  |
| 122 | AW252112  | carbonic anhydrase 11                                                                                                                     | Car11                                                                                                                 | Yes |
| 123 | BF281311  | casein kinase 2, beta subunit                                                                                                             | Csnk2b                                                                                                                | Yes |

|     |            |                                                                                                       |                      |     |
|-----|------------|-------------------------------------------------------------------------------------------------------|----------------------|-----|
| 124 | NM_057138  | CASP8 and FADD-like apoptosis regulator                                                               | Cflar                | Yes |
| 125 | D85899     | caspase 1                                                                                             | Casp1                | Yes |
| 126 | NM_130422  | caspase 12                                                                                            | Casp12               | Yes |
| 127 | AF136231   | caspase 2                                                                                             | Casp2                | Yes |
| 128 | BM387008   | caspase 3, apoptosis related cysteine protease                                                        | Casp3                | Yes |
| 129 | NM_053736  | caspase 4, apoptosis-related cysteine peptidase                                                       | Casp4                | Yes |
| 130 | NM_031775  | caspase 6                                                                                             | Casp6                | Yes |
| 131 | BF283754   | caspase 7                                                                                             | Casp7                | Yes |
| 132 | 1369262_at | caspase 8                                                                                             | Casp8                | Yes |
| 133 | BF282281   | caspase 8 associated protein 2 (predicted)                                                            | Casp8ap2_predicted   | Yes |
| 134 | AF262319   | caspase 9                                                                                             | Casp9                | Yes |
| 135 | NM_022303  | caspase recruitment domain family, member 9                                                           | Card9                | No  |
| 136 | AI136555   | castration induced prostatic apoptosis-related protein 1                                              | Cipar1               | Yes |
| 137 | NM_022597  | cathepsin B                                                                                           | Ctsb                 | Yes |
| 138 | NM_134334  | cathepsin D                                                                                           | Ctsd                 | Yes |
| 139 | AI548979   | cationic trypsinogen                                                                                  | LOC286911            | No  |
| 140 | NM_024125  | CCAAT/enhancer binding protein (C/EBP), beta                                                          | Cebpb                | Yes |
| 141 | 1368813_at | CCAAT/enhancer binding protein (C/EBP), delta                                                         | Cebpd                | Yes |
| 142 | NM_021744  | CD14 antigen                                                                                          | Cd14                 | Yes |
| 143 | NM_017079  | CD1d1 antigen                                                                                         | Cd1d1                | Yes |
| 144 | NM_012830  | CD2 antigen                                                                                           | Cd2                  | Yes |
| 145 | NM_013121  | CD28 antigen                                                                                          | Cd28                 | No  |
| 146 | 1389997_at | CD3 antigen, epsilon polypeptide (predicted)                                                          | Cd3e_predicted       | Yes |
| 147 | AI044631   | CD3 antigen, gamma polypeptide                                                                        | Cd3g_predicted       | No  |
| 148 | D30795     | CD38 antigen                                                                                          | Cd38                 | Yes |
| 149 | AF065147   | CD44 antigen                                                                                          | Cd44                 | Yes |
| 150 | NM_019295  | CD5 antigen                                                                                           | Cd5                  | No  |
| 151 | NM_012523  | CD53 antigen                                                                                          | Cd53                 | Yes |
| 152 | NM_013069  | CD74 antigen (invariant polypeptide of major histocompatibility complex, class II antigen-associated) | Cd74                 | Yes |
| 153 | NM_031755  | CEA-related cell adhesion molecule 1                                                                  | Ceacam1              | Yes |
| 154 | U23056     | CEA-related cell adhesion molecule 1 /// CEA-related cell adhesion molecule 10                        | Ceacam1 /// Ceacam10 | Yes |
| 155 | BF284899   | cell death-inducing DNA fragmentation factor, alpha subunit-like effector A (predicted)               | Cidea_predicted      | Yes |
| 156 | L24388     | cell division cycle 2 homolog (S.pombe)-like 1                                                        | Cdc2                 | No  |
| 157 | AI059933   | Cell division cycle 25 homolog A (S. cerevisiae)                                                      | Cdc2                 | No  |
| 158 | NM_023026  | centaurin, gamma 1                                                                                    | Ceng1a               | No  |
| 159 | NM_031530  | chemokine (C-C motif) ligand 2                                                                        | Ccl2                 | Yes |
| 160 | NM_031116  | chemokine (C-C motif) ligand 5                                                                        | Ccl5                 | Yes |
| 161 | BE095824   | chemokine (C-C motif) ligand 6                                                                        | Ccl6                 | Yes |
| 162 | AA945737   | chemokine (C-X-C motif) receptor 4                                                                    | Cxcr4                | Yes |
| 163 | AI012221   | chloride intracellular channel 1                                                                      | Clc1                 | Yes |
| 164 | NM_012829  | cholecystokinin                                                                                       | Cck                  | Yes |
| 165 | NM_012832  | cholinergic receptor, nicotinic, alpha polypeptide 7                                                  | Chrna7               | No  |
| 166 | AI171615   | chromosome segregation 1-like (S. cerevisiae) (predicted)                                             | Cse11_predicted      | No  |
| 167 | NM_013092  | chymase 1, mast cell                                                                                  | Cma1                 | Yes |
| 168 | AA957183   | Citron                                                                                                | Cit                  | No  |
| 169 | BG673439   | claudin 11                                                                                            | Cldn11               | Yes |
| 170 | AF314657   | clusterin                                                                                             | Clu                  | Yes |
| 171 | NM_012950  | coagulation factor II (thrombin) receptor                                                             | F2r                  | Yes |
| 172 | NM_013057  | coagulation factor III                                                                                | F3                   | Yes |
| 173 | BM389673   | cofilin 1, non-muscle                                                                                 | Cfl1                 | Yes |
| 174 | AF092207   | coiled-coil domain containing 5                                                                       | Ccdc5                | Yes |
| 175 | U00620     | colony stimulating factor 2 (granulocyte-macrophage)                                                  | Csf2                 | No  |
| 176 | NM_130825  | comparative gene identification transcript 94                                                         | Cgi94                | No  |
| 177 | NM_032060  | complement component 3a receptor 1                                                                    | C3ar1                | Yes |
| 178 | NM_053619  | complement component 5, receptor 1                                                                    | C5r1                 | Yes |
| 179 | AA819870   | complement component 8, beta polypeptide (mapped)                                                     | C8b                  | No  |
| 180 | NM_057146  | complement component 9                                                                                | C9                   | No  |
| 181 | AW916366   | COP9 (constitutive photomorphogenic) homolog, subunit 3 (Arabidopsis thaliana)                        | Cops3                | No  |
| 182 | NM_031019  | corticotropin releasing hormone                                                                       | Crh                  | No  |
| 183 | AW433973   | craniofacial development protein 1                                                                    | Cfdp1                | Yes |
| 184 | U47922     | crystallin, alpha A                                                                                   | Cryaa                | No  |
| 185 | NM_012935  | crystallin, alpha B                                                                                   | Cryab                | Yes |
| 186 | AF090695   | CUG triplet repeat, RNA binding protein 2                                                             | Cugbp2               | Yes |
| 187 | BI284428   | cullin 1 (predicted)                                                                                  | Cul1_predicted       | Yes |
| 188 | BI295890   | cullin 2 (predicted)                                                                                  | Cul2_predicted       | No  |
| 189 | BI285751   | cullin 3 (predicted)                                                                                  | Cul3_predicted       | No  |

|     |           |                                                                         |                      |     |
|-----|-----------|-------------------------------------------------------------------------|----------------------|-----|
| 190 | NM_022683 | cullin 5                                                                | Cul5                 | Yes |
| 191 | X64589    | cyclin B1                                                               | Ccnb1                | Yes |
| 192 | AW913890  | cyclin E                                                                | Ccne                 | No  |
| 193 | NM_080885 | cyclin-dependent kinase 5                                               | Cdk5                 | Yes |
| 194 | NM_053891 | cyclin-dependent kinase 5, regulatory subunit 1 (p35)                   | Cdk5r1               | No  |
| 195 | H31766    | cyclin-dependent kinase 9 (CDC2-related kinase)                         | Cdk9                 | Yes |
| 196 | AI010427  | cyclin-dependent kinase inhibitor 1A                                    | Cdkn1a               | Yes |
| 197 | AI013919  | cyclin-dependent kinase inhibitor 1C (P57)                              | Cdkn1c               | Yes |
| 198 | AF474976  | cyclin-dependent kinase inhibitor 2A                                    | Cdkn2a               | No  |
| 199 | AI409867  | cystatin B                                                              | Cstb                 | Yes |
| 200 | BG666933  | cystatin C                                                              | Cst3                 | Yes |
| 201 | NM_031327 | cysteine rich protein 61                                                | Cyr61                | Yes |
| 202 | NM_023965 | cytochrome b-245, beta polypeptide                                      | Cybb                 | Yes |
| 203 | NM_012839 | cytochrome c, somatic                                                   | Cycs                 | Yes |
| 204 | NM_012840 | cytochrome c, testis                                                    | Cyct                 | No  |
| 205 | NM_012840 | cytochrome c, testis /// phosphodiesterase 11A                          | Cyctpd11             | No  |
| 206 | X00469    | cytochrome P450, family 1, subfamily a, polypeptide 1                   | Cyp1a1               | Yes |
| 207 | NM_031543 | cytochrome P450, family 2, subfamily e, polypeptide 1                   | Cyp2e1               | Yes |
| 208 | BF285068  | cytokine induced apoptosis inhibitor 1                                  | Ciapin1              | Yes |
| 209 | BI298817  | Cytotoxic granule-associated RNA binding protein 1                      | Tia1                 | Yes |
| 210 | AI169146  | D4, zinc and double PHD fingers family 2 (predicted)                    | Dpf2_predicted       | Yes |
| 211 | AI408110  | DEAD (Asp-Glu-Ala-Asp) box polypeptide 19                               | Ddx19                | Yes |
| 212 | BM389310  | DEAD (Asp-Glu-Ala-Asp) box polypeptide 41 (predicted)                   | Ddx41_predicted      | No  |
| 213 | BI285645  | death associated protein 3                                              | Dap3                 | Yes |
| 214 | AA818353  | death associated protein kinase 1 (predicted)                           | Dapk1_predicted      | Yes |
| 215 | NM_031800 | death effector domain-containing                                        | Dedd                 | Yes |
| 216 | NM_022526 | death-associated protein                                                | Dap                  | Yes |
| 217 | NM_022546 | death-associated protein kinase 3                                       | Dapk3                | Yes |
| 218 | AI013627  | defender against cell death 1                                           | Dad1                 | Yes |
| 219 | NM_080482 | deleted in bladder cancer chromosome region candidate 1 (human)         | Dbccr                | No  |
| 220 | NM_012841 | deleted in colorectal carcinoma                                         | Dcc                  | No  |
| 221 | NM_013097 | deoxyribonuclease I                                                     | Dnase1               | No  |
| 222 | AF178975  | deoxyribonuclease II                                                    | Dnase2               | Yes |
| 223 | NM_053907 | deoxyribonuclease I-like 3                                              | LOC681124            | No  |
| 224 | NM_022531 | desmin                                                                  | Des                  | Yes |
| 225 | BE110572  | diablo homolog (Drosophila)                                             | Diablo               | No  |
| 226 | AI236726  | DNA fragmentation factor, alpha subunit                                 | Dffa                 | No  |
| 227 | NM_053362 | DNA fragmentation factor, beta subunit                                  | Dffb                 | No  |
| 228 | NM_024134 | DNA-damage inducible transcript 3                                       | Ddit3                | Yes |
| 229 | NM_080906 | DNA-damage-inducible transcript 4                                       | Ddit4                | Yes |
| 230 | BI282224  | DnaJ (Hsp40) homolog, subfamily A, member 3                             | LOC294513            | No  |
| 231 | BM384926  | DnaJ (Hsp40) homolog, subfamily B, member 1 (predicted)                 | Dnajb1_predicted     | Yes |
| 232 | NM_012699 | DnaJ (Hsp40) homolog, subfamily B, member 9                             | Dnajb9               | Yes |
| 233 | BI285682  | DnaJ (Hsp40) homolog, subfamily C, member 7                             | Dnajc7               | Yes |
| 234 | BF406540  | DnaJ (Hsp40) related, subfamily B, member 13                            | Dnajb13              | No  |
| 235 | L12407    | dopamine beta hydroxylase                                               | Dbh                  | No  |
| 236 | NM_012547 | dopamine receptor 2                                                     | Drd2                 | No  |
| 237 | M35077    | dopamine receptor D1A                                                   | Drd1a                | No  |
| 238 | BE110108  | dual specificity phosphatase 1                                          | Dusp1                | No  |
| 239 | AI172067  | dual specificity phosphatase 22 (predicted)                             | Dusp22_predicted     | Yes |
| 240 | U23438    | dual specificity phosphatase 4                                          | Dusp4                | No  |
| 241 | NM_133578 | dual specificity phosphatase 5                                          | Dusp5                | Yes |
| 242 | NM_053883 | dual specificity phosphatase 6                                          | Dusp6                | Yes |
| 243 | L24562    | dynamain 2                                                              | Dnm2                 | Yes |
| 244 | NM_053319 | dynein light chain LC8-type 1                                           | Dynll1               | Yes |
| 245 | NM_012551 | early growth response 1                                                 | Egr1                 | Yes |
| 246 | AF115249  | endothelial differentiation, sphingolipid G-protein-coupled receptor, 8 | Edg8                 | No  |
| 247 | NM_023090 | endothelial PAS domain protein 1                                        | Epas1                | No  |
| 248 | NM_053596 | endothelin converting enzyme 1                                          | Ece1                 | Yes |
| 249 | AB023896  | endothelin converting enzyme-like 1                                     | Ecel1                | No  |
| 250 | X57764    | endothelin receptor type B                                              | Ednrb                | Yes |
| 251 | BI291645  | engulfment and cell motility 3, ced-12 homolog (C. elegans)             | Elmo3                | Yes |
| 252 | NM_012842 | epidermal growth factor                                                 | Egfr                 | No  |
| 253 | M37394    | epidermal growth factor receptor                                        | Egfr                 | Yes |
| 254 | AF187818  | epidermal growth factor receptor /// peptidase D (mapped)               | Egfr /// Pepd_mapped | Yes |
| 255 | BF564277  | epilepsy, progressive myoclonic epilepsy, type 2 gene alpha             | Epme                 | No  |

|     |           |                                                                                                                                                                                                                                                                |                     |     |
|-----|-----------|----------------------------------------------------------------------------------------------------------------------------------------------------------------------------------------------------------------------------------------------------------------|---------------------|-----|
| 256 | NM_017001 | erythropoietin                                                                                                                                                                                                                                                 | Epo                 | No  |
| 257 | AA866269  | Estrogen receptor 1                                                                                                                                                                                                                                            | Esr1                | No  |
| 258 | AF042058  | estrogen receptor 2 beta                                                                                                                                                                                                                                       | Esr2b               | No  |
| 259 | BF398331  | estrogen receptor-binding fragment-associated gene 9                                                                                                                                                                                                           | Ebag9               | Yes |
| 260 | AI412114  | etoposide induced 2.4 mRNA                                                                                                                                                                                                                                     | Ei24                | Yes |
| 261 | NM_012660 | eukaryotic translation elongation factor 1 alpha 2                                                                                                                                                                                                             | Eef1a2              | Yes |
| 262 | AI600237  | eukaryotic translation elongation factor 1 epsilon 1 (predicted)                                                                                                                                                                                               | Eef1e1_predicted    | Yes |
| 263 | NM_053950 | eukaryotic translation initiation factor 2B, subunit 4 delta                                                                                                                                                                                                   | Eif2b4              | Yes |
| 264 | NM_053974 | eukaryotic translation initiation factor 4E                                                                                                                                                                                                                    | Eif4e               | Yes |
| 265 | BI283681  | eukaryotic translation initiation factor 5A                                                                                                                                                                                                                    | Eif5a               | Yes |
| 266 | BM388758  | excision repair cross-complementing rodent repair deficiency, complementation group 3                                                                                                                                                                          | Erc3                | Yes |
| 267 | D13374    | expressed in non-metastatic cells 1                                                                                                                                                                                                                            | Nme1                | No  |
| 268 | AI385371  | extra spindle poles like 1 (S. cerevisiae) (predicted)                                                                                                                                                                                                         | Esp1_predicted      | Yes |
| 269 | NM_080895 | Fas apoptotic inhibitory molecule                                                                                                                                                                                                                              | Faim                | Yes |
| 270 | AF044201  | Fas apoptotic inhibitory molecule 2                                                                                                                                                                                                                            | Faim2               | No  |
| 271 | NM_080891 | Fas death domain-associated protein                                                                                                                                                                                                                            | Daxx                | Yes |
| 272 | NM_012908 | Fas ligand (TNF superfamily, member 6)                                                                                                                                                                                                                         | Faslg               | Yes |
| 273 | AI227743  | Fas-activated serine/threonine kinase                                                                                                                                                                                                                          | Fastk               | Yes |
| 274 | NM_130406 | Fas-associated factor 1                                                                                                                                                                                                                                        | Faf1                | Yes |
| 275 | NM_053843 | Fc receptor, IgG, low affinity III /// Fc gamma receptor II beta                                                                                                                                                                                               | Fcgr3 /// LOC498276 | Yes |
| 276 | AA999104  | Feminization 1 homolog b (C. elegans) (predicted)                                                                                                                                                                                                              | Fem1_predicted      | No  |
| 277 | NM_019305 | fibroblast growth factor 2                                                                                                                                                                                                                                     | Fgf2                | No  |
| 278 | NM_130817 | fibroblast growth factor 3                                                                                                                                                                                                                                     | Fgf3                | No  |
| 279 | AB079673  | fibroblast growth factor 4                                                                                                                                                                                                                                     | Fgf4                | No  |
| 280 | NM_133286 | fibroblast growth factor 8                                                                                                                                                                                                                                     | Fgf8                | No  |
| 281 | S54008    | Fibroblast growth factor receptor 1                                                                                                                                                                                                                            | Fgfr1               | Yes |
| 282 | NM_053429 | fibroblast growth factor receptor 3                                                                                                                                                                                                                            | Fgfr3               | Yes |
| 283 | AA893484  | fibronectin 1                                                                                                                                                                                                                                                  | Fn1                 | Yes |
| 284 | AI103600  | Filamin C, gamma (actin binding protein 280) (predicted)                                                                                                                                                                                                       | Fln1_predicted      | Yes |
| 285 | AF040256  | folate hydrolase                                                                                                                                                                                                                                               | Folh1               | No  |
| 286 | M36804    | follicle stimulating hormone beta                                                                                                                                                                                                                              | Fshb                | No  |
| 287 | NM_012561 | follistatin                                                                                                                                                                                                                                                    | Fst                 | Yes |
| 288 | BI295511  | forkhead box O1A                                                                                                                                                                                                                                               | Foxo1a              | Yes |
| 289 | AI231684  | forkhead box O3a (predicted)                                                                                                                                                                                                                                   | Foxo3a_predicted    | Yes |
| 290 | NM_012953 | fos-like antigen 1                                                                                                                                                                                                                                             | Fos1                | No  |
| 291 | NM_012954 | fos-like antigen 2 /// FBJ osteosarcoma oncogene B                                                                                                                                                                                                             | Fosl2 /// Fosb      | Yes |
| 292 | NM_017181 | fumarylacetoacetate hydrolase                                                                                                                                                                                                                                  | Fah                 | Yes |
| 293 | BE108192  | G1 to S phase transition 1                                                                                                                                                                                                                                     | Gspt1               | Yes |
| 294 | NM_033237 | galanin                                                                                                                                                                                                                                                        | Gal                 | Yes |
| 295 | NM_019172 | galanin receptor 2                                                                                                                                                                                                                                             | Galr2               | No  |
| 296 | NM_053840 | gamma-glutamyltransferase 1                                                                                                                                                                                                                                    | Ggt1                | Yes |
| 297 | NM_019281 | gap junction membrane channel protein alpha 9                                                                                                                                                                                                                  | Gja9                | No  |
| 298 | NM_053388 | gap junction membrane channel protein beta 6                                                                                                                                                                                                                   | Gja6                | No  |
| 299 | NM_012849 | gastrin                                                                                                                                                                                                                                                        | Gast                | No  |
| 300 | AA945758  | gb:AA945758 /DB_XREF=gi:3105674 /DB_XREF=EST201257 /CLONE=RLUAS87 /FEA=EST /CNT=13 /TID=Rn.7908.1 /TIER=Stack /STK=8 /UG=Rn.7908 /UG_TITLE=ESTs                                                                                                                | NS                  | No  |
| 301 | AI230220  | gb:AI230220 /DB_XREF=gi:3814107 /DB_XREF=EST226915 /CLONE=REMCT79 /FEA=EST /CNT=9 /TID=Rn.24381.1 /TIER=Stack /STK=7 /UG=Rn.24381 /UG_TITLE=ESTs, Moderately similar to MLE3 RAT MYOSIN LIGHT CHAIN 3, SKELETAL MUSCLE ISOFORM (R.norvegicus)                  | NS                  | No  |
| 302 | BF555051  | gb:BF555051 /DB_XREF=gi:11664781 /DB_XREF=UI-R-E0-cg-f-04-0-UI.r1 /CLONE=UI-R-E0-cg-f-04-0-UI /FEA=EST /CNT=3 /TID=Rn.65517.1 /TIER=ConsEnd /STK=1 /UG=Rn.65517 /UG_TITLE=ESTs, Weakly similar to VITAMIN K-DEPENDENT PROTEIN S PRECURSOR (R.norvegicus)       | NS                  | No  |
| 303 | BM384229  | gb:BM384229 /DB_XREF=gi:18184282 /DB_XREF=UI-R-DZ0-cks-c-03-0-UI.s1 /CLONE=UI-R-DZ0-cks-c-03-0-UI /FEA=EST /CNT=12 /TID=Rn.14615.1 /TIER=Stack /STK=11 /UG=Rn.14615 /UG_TITLE=ESTs, Highly similar to TRA2 MOUSE TNF RECEPTOR ASSOCIATED FACTOR 2 (M.musculus) | NS                  | No  |
| 304 | J02582    | gb:J02582 /DB_XREF=gi:202957 /FEA=DNA_2 /CNT=1 /TID=Rn.64667.1 /TIER=ConsEnd /STK=0 /UG=Rn.64667 /UG_TITLE=Rat apolipoprotein E gene, complete cds /DEF=Rat apolipoprotein E gene, complete cds                                                                | NS                  | No  |
| 305 | BI285576  | gelsolin                                                                                                                                                                                                                                                       | Gsn                 | Yes |
| 306 | NM_021669 | ghrelin precursor                                                                                                                                                                                                                                              | Ghrl                | No  |
| 307 | NM_019139 | glial cell line derived neurotrophic factor                                                                                                                                                                                                                    | Gdnf                | No  |
| 308 | BF281741  | glioma tumor suppressor candidate region gene 2                                                                                                                                                                                                                | Gltscr2             | Yes |
| 309 | NM_012728 | glucagon-like peptide 1 receptor                                                                                                                                                                                                                               | Glp1r               | Yes |
| 310 | BI283882  | glucose phosphate isomerase                                                                                                                                                                                                                                    | Gpi                 | Yes |
| 311 | NM_017006 | glucose-6-phosphate dehydrogenase X-linked                                                                                                                                                                                                                     | G6pdx               | Yes |
| 312 | U08259    | glutamate receptor, ionotropic, NMDA2C                                                                                                                                                                                                                         | Grin2c              | No  |
| 313 | NM_017010 | glutamate receptor, ionotropic, N-methyl D-aspartate 1                                                                                                                                                                                                         | Grin1               | No  |

|     |            |                                                                                               |                                   |     |
|-----|------------|-----------------------------------------------------------------------------------------------|-----------------------------------|-----|
| 314 | AF001423   | glutamate receptor, ionotropic, N-methyl D-aspartate 2A                                       | Grin2a                            | No  |
| 315 | M91562     | glutamate receptor, ionotropic, N-methyl D-aspartate 2B                                       | Grin2b                            | No  |
| 316 | NM_017011  | glutamate receptor, metabotropic 1                                                            | Gria2bm1                          | No  |
| 317 | M92075     | glutamate receptor, metabotropic 2                                                            | Grm2                              | No  |
| 318 | AW522430   | glutamate receptor, metabotropic 3                                                            | Grm3                              | No  |
| 319 | NM_022202  | glutamate receptor, metabotropic 8                                                            | Gria2bm8                          | No  |
| 320 | J05181     | glutamate-cysteine ligase, catalytic subunit                                                  | Gclc                              | Yes |
|     |            |                                                                                               | Qars ///                          |     |
| 321 | BG380882   | glutaminyl-tRNA synthetase ///<br>similar to glutaminyl-tRNA synthetase (predicted)           | RGD1562301_predicted              | Yes |
| 322 | NM_022278  | glutaredoxin 1 (thioltransferase)                                                             | Glrx1                             | Yes |
| 323 | S41066     | glutathione peroxidase 1                                                                      | Gpx1                              | Yes |
| 324 | NM_017165  | glutathione peroxidase 4                                                                      | Gpx4                              | Yes |
| 325 | NM_017013  | glutathione-S-transferase, alpha type2                                                        | Gsta2                             | Yes |
| 326 | X02904     | glutathione-S-transferase, pi 1 ///<br>glutathione S-transferase, pi 2                        | Gstp1 ///<br>Gstp2                | Yes |
| 327 | NM_017008  | glyceraldehyde-3-phosphate dehydrogenase ///<br>(predicted)                                   | Gapdh                             | Yes |
|     |            |                                                                                               | RGD1564351_predicted              |     |
| 328 | BF287444   | glycogen synthase kinase 3 beta                                                               | Gsk3b                             | No  |
| 329 | AI103970   | glyoxylase 1                                                                                  | Glo1                              | Yes |
| 330 | BM391371   | goliath                                                                                       | LOC652955                         | Yes |
| 331 | NM_031038  | gonadotropin releasing hormone receptor                                                       | Gnrhr                             | No  |
| 332 | NM_012767  | gonadotropin-releasing hormone 1                                                              | Gnrh1                             | No  |
| 333 | M34097     | granzyme B                                                                                    | Gzmb                              | Yes |
| 334 | U57063     | granzyme G                                                                                    | Gzmg                              | No  |
| 335 | NM_019282  | gremlin 1 homolog, cysteine knot superfamily (Xenopus laevis)                                 | Grem1                             | Yes |
| 336 | NM_024127  | growth arrest and DNA-damage-inducible 45 alpha                                               | Gadd45a                           | Yes |
| 337 | BI287978   | growth arrest and DNA-damage-inducible 45 beta                                                | Gadd45b                           | Yes |
| 338 | AI599423   | growth arrest and DNA-damage-inducible 45 gamma                                               | Gadd45g                           | Yes |
| 339 | NM_057100  | growth arrest specific 6                                                                      | Gas6                              | Yes |
| 340 | X62853     | Growth factor receptor bound protein 2                                                        | Grb2                              | Yes |
| 341 | V01238     | growth hormone 1                                                                              | Gh1                               | No  |
| 342 | AI170771   | growth hormone receptor                                                                       | Ghr                               | Yes |
| 343 | U94321     | growth hormone secretagogue receptor                                                          | Gshr                              | No  |
| 344 | NM_024356  | GTP cyclohydrolase 1                                                                          | Gch                               | Yes |
| 345 | BM389208   | GTPase, IMAP family member 4                                                                  | Gimap4                            | Yes |
| 346 | M12672     | guanine nucleotide binding protein, alpha inhibiting 2                                        | Gnai2                             | Yes |
| 347 | BE117491   | guanine nucleotide binding protein, alpha q polypeptide                                       | Gnaq                              | Yes |
| 348 | BM390519   | GULP, engulfment adaptor PTB domain containing 1                                              | Gulp1                             | Yes |
| 349 | BG379941   | Harvey rat sarcoma viral (v-Ha-ras) oncogene homolog                                          | Hras                              | Yes |
| 350 | NM_012966  | heat shock 10 kDa protein 1 (chaperonin 10)                                                   | Hspe1                             | Yes |
| 351 | AI236601   | heat shock 105kDa/110kDa protein 1                                                            | Hsph1                             | Yes |
| 352 | NM_031970  | heat shock 27kDa protein 1                                                                    | Hspb1                             | Yes |
|     |            |                                                                                               | Hspa1a ///                        |     |
| 353 | NM_031971  | heat shock 70kD protein 1A ///<br>heat shock 70kD protein 1B (mapped)                         | Hspa1b_mapped                     | Yes |
| 354 | BI278231   | heat shock 70kD protein 1B (mapped)                                                           | Hspa1b_mapped                     | Yes |
| 355 | M14050     | heat shock 70kDa protein 5 (glucose-regulated protein)                                        | Hspa5                             | Yes |
| 356 | BI282281   | heat shock 70kDa protein 9A (predicted)                                                       | Hspa9a_predicted                  | Yes |
| 357 | AI237389   | heat shock 90kDa protein 1, beta                                                              | Hspcb                             | Yes |
| 358 | NM_022229  | heat shock protein 1 (chaperonin)                                                             | Hspd1                             | Yes |
| 359 | BG671521   | heat shock protein 1, alpha                                                                   | Hspca                             | Yes |
| 360 | AF077354   | heat shock protein 4                                                                          | Hspa4                             | Yes |
| 361 | NM_012580  | heme oxygenase (decycling) 1                                                                  | Hmox1                             | Yes |
| 362 | NM_013185  | hemopoietic cell kinase                                                                       | Hck                               | Yes |
| 363 | 1387701_at | hepatocyte growth factor                                                                      | Hgf                               | Yes |
| 364 | NM_012734  | hexokinase 1                                                                                  | Hk1                               | Yes |
| 365 | NM_012735  | hexokinase 2                                                                                  | Hk2                               | Yes |
| 366 | BG378885   | high mobility group AT-hook 1                                                                 | Hmga1                             | Yes |
| 367 | BE107162   | high mobility group box 1                                                                     | Hmgb1                             | Yes |
| 368 | AF275734   | high mobility group box 1 ///<br>similar to High mobility group protein 1 (HMG-1) (predicted) | Hmgb1 ///<br>RGD1562312_predicted | Yes |
|     |            |                                                                                               | Hdac1_predicted                   | Yes |
| 369 | AI180339   | histone deacetylase 1 (predicted)                                                             | Hdac3                             | Yes |
| 370 | NM_053448  | histone deacetylase 3                                                                         | Hdac5                             | Yes |
| 371 | BF403027   | histone deacetylase 5                                                                         | Bat3                              | Yes |
| 372 | NM_053609  | HLA-B-associated transcript 3                                                                 |                                   |     |
| 373 | M37568     | homeo box C8 (mapped)                                                                         | Hoxc8_mapped                      | No  |
| 374 | BM392321   | homeodomain interacting protein kinase 2 (predicted)                                          | Hipk2_predicted                   | Yes |
| 375 | NM_031787  | homeodomain interacting protein kinase 3                                                      | Hipk3                             | Yes |
| 376 | AB003726   | homer homolog 1 (Drosophila)                                                                  | Homer1                            | No  |

|     |            |                                                                                                |                   |     |
|-----|------------|------------------------------------------------------------------------------------------------|-------------------|-----|
| 377 | NM_053523  | homocysteine-inducible, endoplasmic reticulum stress-inducible, ubiquitin-like domain member 1 | Herpud1           | Yes |
| 378 | BE111733   | hormone-regulated proliferation associated protein 20                                          | Hrpap20           | Yes |
| 379 | AW253339   | huntingtin interacting protein 1                                                               | Hip1              | Yes |
| 380 | U18650     | Huntington disease gene homolog                                                                | Hdh               | Yes |
| 381 | NM_019371  | hypothetical gene supported by NM_019371                                                       | LOC497816         | Yes |
| 382 | BM390522   | hypothetical gene supported by NM_130426                                                       | LOC497808         | Yes |
| 383 | H31665     | hypoxia induced gene 1                                                                         | Hig1              | Yes |
| 384 | NM_024359  | hypoxia inducible factor 1, alpha subunit                                                      | Hif1a             | Yes |
| 385 | BI282904   | hypoxia up-regulated 1                                                                         | Hyou1             | Yes |
| 386 | AI176519   | immediate early response 3                                                                     | Ier3              | Yes |
| 387 | AI411947   | immunoglobulin heavy chain 1a (serum IgG2a)                                                    | Igh-1a            | Yes |
| 388 | NM_023973  | indoleamine-pyrrole 2,3 dioxygenase                                                            | Indo              | No  |
| 389 | NM_012590  | inhibin alpha                                                                                  | Inha              | No  |
| 390 | NM_017128  | inhibin beta-A                                                                                 | Inhba             | No  |
| 391 | NM_013060  | inhibitor of DNA binding 2                                                                     | Id2               | Yes |
| 392 | AF000942   | inhibitor of DNA binding 3                                                                     | Id3               | Yes |
| 393 | NM_053355  | inhibitor of kappaB kinase beta                                                                | Ikbkb             | Yes |
| 394 | J05510     | inositol 1,4,5-triphosphate receptor 1                                                         | Itrp1             | Yes |
| 395 | NM_019311  | inositol polyphosphate-5-phosphatase D                                                         | Inppd5            | No  |
| 396 | NM_019129  | insulin 1                                                                                      | Igf2bp1           | No  |
| 397 | NM_032074  | insulin receptor substrate 3                                                                   | Irs3              | Yes |
| 398 | M15481     | insulin-like growth factor 1                                                                   | Igf1              | Yes |
| 399 | NM_052807  | insulin-like growth factor 1 receptor                                                          | Igf1r             | Yes |
| 400 | NM_031511  | insulin-like growth factor 2                                                                   | Igf2              | Yes |
| 401 | NM_012588  | insulin-like growth factor binding protein 3                                                   | Igfbp3            | Yes |
| 402 | BF282337   | integral membrane protein 2B                                                                   | Itm2b             | Yes |
| 403 | NM_017022  | integrin beta 1 (fibronectin receptor beta)                                                    | Itgb1             | Yes |
| 404 | NM_133409  | integrin linked kinase                                                                         | Ilk               | Yes |
| 405 | NM_019127  | interferon beta 1, fibroblast                                                                  | Ifnb1f            | No  |
| 406 | AF010466   | interferon gamma                                                                               | Ifng              | No  |
| 407 | NM_012591  | interferon regulatory factor 1                                                                 | Irf1              | Yes |
| 408 | NM_017019  | interleukin 1 alpha                                                                            | Il1a              | Yes |
| 409 | NM_031512  | interleukin 1 beta                                                                             | Il1b              | Yes |
| 410 | L02926     | interleukin 10                                                                                 | Il10              | No  |
| 411 | AF347936   | interleukin 11 receptor, alpha chain 1                                                         | Il11ra1           | Yes |
| 412 | NM_053828  | interleukin 13                                                                                 | Il13              | No  |
| 413 | AF015718   | interleukin 15                                                                                 | Il15              | Yes |
| 414 | AJ222813   | interleukin 18                                                                                 | Il18              | Yes |
| 415 | NM_013163  | interleukin 2 receptor, alpha chain                                                            | Il2ra             | Yes |
| 416 | NM_013195  | interleukin 2 receptor, beta chain                                                             | Il2rb             | Yes |
| 417 | NM_031513  | interleukin 3                                                                                  | Il6               | No  |
| 418 | X16058     | interleukin 4                                                                                  | Il4               | No  |
| 419 | NM_012589  | interleukin 6                                                                                  | Il6               | Yes |
| 420 | AF367210   | interleukin 7                                                                                  | Il7               | Yes |
| 421 | BF405951   | Interleukin-1 receptor-associated kinase 4 (predicted)                                         | Irak4_predicted   | No  |
| 422 | 1388184_at | isoprenylcysteine carboxyl methyltransferase                                                   | Icmt              | Yes |
| 423 | NM_031514  | Janus kinase 2                                                                                 | Jak2              | Yes |
| 424 | BE096021   | Jun D proto-oncogene                                                                           | Jund1             | No  |
| 425 | BI288619   | Jun oncogene                                                                                   | Jun               | Yes |
| 426 | NM_021836  | Jun-B oncogene                                                                                 | Junb              | Yes |
| 427 | NM_012696  | kininogen 1 /// K-kininogen /// similar to alpha-1 major acute phase protein prepeptide        | Kng1 /// LOC25087 | Yes |
| 428 | NM_031135  | Kruppel-like factor 10                                                                         | Klf10             | Yes |
| 429 | BM385790   | Kruppel-like factor 2 (lung) (predicted)                                                       | Klf2_predicted    | Yes |
| 430 | NM_053394  | Kruppel-like factor 5                                                                          | Klf5              | Yes |
| 431 | NM_053902  | kynureninase (L-kynurenine hydrolase)                                                          | Kynu              | No  |
| 432 | NM_012594  | Lactalbumin, alpha                                                                             | Lalba             | No  |
| 433 | NM_019904  | lectin, galactose binding, soluble 1                                                           | Lgals1            | Yes |
| 434 | NM_031832  | lectin, galactose binding, soluble 3                                                           | Lgals3            | Yes |
| 435 | NM_022582  | lectin, galactose binding, soluble 7                                                           | Lgals7            | Yes |
| 436 | NM_031048  | leukemia inhibitory factor receptor                                                            | Lifr              | Yes |
| 437 | NM_031727  | LIM motif-containing protein kinase 1                                                          | Limk1             | Yes |
| 438 | NM_130741  | lipocalin 2                                                                                    | Lcn2              | Yes |
| 439 | BF289368   | lipopolysaccharide binding protein                                                             | Lbp               | Yes |
| 440 | BI284739   | LPS-induced TN factor                                                                          | Litaf             | Yes |
| 441 | AA874924   | lymphocyte antigen 86 (predicted)                                                              | Ly86_predicted    | Yes |
| 442 | AI137137   | lymphocyte protein tyrosine kinase (mapped)                                                    | Lck_mapped        | Yes |

|     |           |                                                                                 |                    |     |
|-----|-----------|---------------------------------------------------------------------------------|--------------------|-----|
| 443 | AI012109  | lymphocyte specific 1                                                           | Lsp1               | Yes |
| 444 | NM_080769 | lymphotoxin A                                                                   | Lta                | No  |
| 445 | NM_053538 | lysosomal-associated protein transmembrane 5                                    | Laptm5             | Yes |
| 446 | NM_031051 | macrophage migration inhibitory factor                                          | Mif                | Yes |
| 447 | NM_024352 | Macrophage stimulating 1 (hepatocyte growth factor-like)                        | Mst1               | Yes |
| 448 | NM_019191 | MAD homolog 2 (Drosophila)                                                      | Smad2              | Yes |
| 449 | AA997679  | MAD homolog 3 (Drosophila)                                                      | Smad3              | Yes |
| 450 | NM_019275 | MAD homolog 4 (Drosophila)                                                      | Smad4              | Yes |
| 451 | AW521447  | MAD homolog 7 (Drosophila)                                                      | Madh7              | Yes |
| 452 | NM_053585 | MAP-kinase activating death domain                                              | Madd               | Yes |
| 453 | U65656    | matrix metalloproteinase 2                                                      | Mmp2               | Yes |
| 454 | NM_031055 | matrix metalloproteinase 9                                                      | Mmp9               | Yes |
| 455 | BI289109  | max binding protein (predicted)                                                 | Mnt_predicted      | Yes |
| 456 | AW143154  | megakaryoblastic leukemia (translocation) 1 (predicted)                         | Mkl1_predicted     | Yes |
| 457 | NM_053409 | melanoma antigen, family D, 1                                                   | Maged1             | Yes |
| 458 | AF411318  | metallothionein 1a                                                              | Mt1a               | Yes |
| 459 | NM_053307 | methionine sulfoxide reductase A                                                | Msrb2              | No  |
| 460 | BI281702  | microtubule-associated protein 1b                                               | Map1b              | Yes |
| 461 | BE107978  | microtubule-associated protein tau /// hypothetical gene supported by NM_017212 | Mapt /// LOC497674 | Yes |
| 462 | BG665132  | mitochondrial carrier homolog 1 (C. elegans)                                    | Mtch1              | Yes |
| 463 | AA943734  | mitochondrial protein, 18 kDa                                                   | MGC94604           | Yes |
| 464 | BG378230  | mitochondrial ribosomal protein S30 (predicted)                                 | Mrps30_predicted   | Yes |
| 465 | NM_053842 | mitogen activated protein kinase 1                                              | Mapk1              | Yes |
| 466 | NM_012806 | mitogen activated protein kinase 10                                             | Mapk10             | No  |
| 467 | AW254190  | mitogen activated protein kinase 14                                             | Mapk14             | Yes |
| 468 | AF155236  | mitogen activated protein kinase 3                                              | Mapk3              | Yes |
| 469 | NM_053777 | mitogen activated protein kinase 8 interacting protein                          | Mapk8ip            | Yes |
| 470 | D13341    | mitogen activated protein kinase kinase 1                                       | Map2k1             | Yes |
| 471 | D14592    | mitogen activated protein kinase kinase 2                                       | Map2k2             | Yes |
| 472 | NM_053887 | mitogen activated protein kinase kinase kinase 1                                | Map3k1             | Yes |
| 473 | NM_013055 | mitogen activated protein kinase kinase kinase 12                               | Map3k12            | No  |
| 474 | AI146037  | Mitogen activated protein kinase kinase kinase 7 (predicted)                    | Map3k7_predicted   | Yes |
| 475 | AI575972  | Mitogen-activated protein kinase 8 interacting protein 2                        | Mapk8ip2           | No  |
| 476 | NM_017322 | mitogen-activated protein kinase 9                                              | Mapk9              | Yes |
| 477 | BI281589  | mitogen-activated protein kinase kinase kinase 11                               | Map3k11            | Yes |
| 478 | NM_053847 | mitogen-activated protein kinase kinase kinase 8                                | Map3k8             | Yes |
| 479 | D00688    | monoamine oxidase A                                                             | Maoa               | Yes |
| 480 | NM_012982 | msh homeo box homolog 2 (Drosophila)                                            | Msx2               | No  |
| 481 | NM_053337 | Msx-interacting-zinc finger                                                     | Miz1               | Yes |
| 482 | BI274326  | mucin 1, transmembrane                                                          | Muc1               | Yes |
| 483 | BM391100  | mucin 4                                                                         | Muc4               | No  |
| 484 | NM_031053 | mutL homolog 1 (E. coli) /// hypothetical gene supported by NM_031053           | Mlh1 /// LOC497834 | Yes |
| 485 | NM_021837 | myc-like oncogene, s-myc protein                                                | Mycs               | No  |
| 486 | NM_012798 | myelin and lymphocyte protein, T-cell differentiation protein                   | Mal                | No  |
| 487 | BF281184  | myeloblastosis oncogene-like 2 (predicted)                                      | Mybl2_predicted    | No  |
| 488 | NM_012603 | myelocytomatosis viral oncogene homolog (avian)                                 | Myc                | Yes |
| 489 | AI172056  | myeloid cell leukemia sequence 1                                                | Mcl1               | Yes |
| 490 | BI284349  | myeloid differentiation primary response gene 116                               | Myd116             | Yes |
| 491 | AI236590  | myeloid differentiation primary response gene 88                                | Myd88              | Yes |
| 492 | NM_030860 | myocyte enhancer factor 2D                                                      | Mef2d              | No  |
| 493 | J02679    | NAD(P)H dehydrogenase, quinone 1                                                | Nqo1               | Yes |
| 494 | NM_053683 | NADPH oxidase 1                                                                 | Noxa1              | No  |
| 495 | AI178285  | NCK-associated protein 1                                                        | Nckap1             | Yes |
| 496 | NM_031069 | NEL-like 1 (chicken)                                                            | Nell1              | Yes |
| 497 | NM_012610 | nerve growth factor receptor (TNFR superfamily, member 16)                      | Ngfr               | No  |
| 498 | NM_053401 | nerve growth factor receptor (TNFRSF16) associated protein 1                    | Ngfrap1            | Yes |
| 499 | BM388972  | nerve growth factor, beta (mapped)                                              | Norb               | No  |
| 500 | U02323    | neuregulin 1                                                                    | Nrg1               | No  |
| 501 | NM_023968 | neuropeptide Y receptor Y2                                                      | Npy2r              | No  |
| 502 | NM_021589 | neurotrophic tyrosine kinase, receptor, type 1                                  | Ntrk1              | No  |
| 503 | NM_031073 | neurotrophin 3                                                                  | Ntf3               | Yes |
| 504 | AI598730  | neurotrophin receptor associated death domain                                   | Nradd              | Yes |
| 505 | NM_053734 | neutrophil cytosolic factor 1                                                   | Ncf1               | Yes |
| 506 | BI285459  | nicastrin                                                                       | Ncstn              | Yes |
| 507 | L12562    | nitric oxide synthase 2, inducible                                              | Nos2               | Yes |
| 508 | AJ011116  | nitric oxide synthase 3, endothelial cell                                       | Nos3               | Yes |



|     |           |                                                                                              |                    |     |
|-----|-----------|----------------------------------------------------------------------------------------------|--------------------|-----|
| 509 | NM_053507 | non-metastatic cell expressed protein 3                                                      | Nme3               | Yes |
| 510 | BF389398  | Notch gene homolog 1 (Drosophila)                                                            | Notch1             | Yes |
| 511 | AI011448  | Notch gene homolog 2 (Drosophila)                                                            | Notch2             | Yes |
| 512 | NM_020087 | Notch gene homolog 3 (Drosophila)                                                            | Notch3             | No  |
| 513 | BG377358  | nuclear factor of activated T-cells, cytoplasmic, calcineurin-dependent 4                    | Nfatc4             | No  |
| 514 | AA858801  | nuclear factor of kappa light chain gene enhancer in B-cells 1, p105                         | Nfkb1              | Yes |
| 515 | AW672589  | nuclear factor of kappa light chain gene enhancer in B-cells inhibitor, alpha                | Nfkbia             | Yes |
| 516 | NM_030867 | nuclear factor of kappa light chain gene enhancer in B-cells inhibitor, beta                 | Nfkbib             | Yes |
| 517 | NM_012991 | nuclear pore associated protein                                                              | Npap60             | No  |
| 518 | NM_021745 | nuclear receptor subfamily 1, group H, member 4                                              | Nr1h4              | No  |
| 519 | NM_052980 | nuclear receptor subfamily 1, group I, member 2                                              | Nrc1i2             | No  |
| 520 | NM_017323 | nuclear receptor subfamily 2, group C, member 2                                              | Nrc2c2             | No  |
| 521 | AY066016  | nuclear receptor subfamily 3, group C, member 1                                              | Nr3c1              | Yes |
| 522 | NM_013131 | nuclear receptor subfamily 3, group C, member 2                                              | Nr3c2              | Yes |
| 523 | NM_024388 | nuclear receptor subfamily 4, group A, member 1                                              | Nr4a1              | Yes |
| 524 | NM_031628 | nuclear receptor subfamily 4, group A, member 3                                              | Nr4a3              | Yes |
| 525 | NM_022799 | nuclear ubiquitous casein kinase and cyclin-dependent kinase substrate                       | Nucks              | Yes |
| 526 | NM_053516 | nucleolar protein 3 (apoptosis repressor with CARD domain)                                   | Nol3               | Yes |
| 527 | NM_012992 | nucleophosmin 1                                                                              | Npm1               | Yes |
| 528 | J04943    | nucleophosmin 1 /// similar to Nucleophosmin (NPM) (Nucleolar phosphoprotein B23) (Numatrin) | Npm1 /// LOC300303 | Yes |
| 529 | BI286040  | nucleoporin 62                                                                               | Nup62              | Yes |
| 530 | NM_133525 | Nucleoside 2-deoxyribosyltransferase domain containing protein RGD620382                     | RGD620382          | No  |
| 531 | NM_012861 | O-6-methylguanine-DNA methyltransferase                                                      | Mgmt               | Yes |
| 532 | L20684    | opioid receptor, mu 1                                                                        | Oprl1              | No  |
| 533 | NM_133585 | optic atrophy 1 homolog (human)                                                              | Opa1               | Yes |
| 534 | NM_053288 | orosomucoid 1                                                                                | Orm1               | Yes |
| 535 | NM_130402 | osteoclast inhibitory lectin                                                                 | Ocil               | No  |
| 536 | NM_133306 | oxidized low density lipoprotein (lectin-like) receptor 1                                    | Oldlr1             | Yes |
| 537 | NM_019210 | p21 (CDKN1A)-activated kinase 3                                                              | Pak3               | No  |
| 538 | NM_053289 | pancreatitis-associated protein                                                              | Pap                | Yes |
| 539 | NM_017044 | parathyroid hormone                                                                          | Pth                | No  |
| 540 | BI281756  | Parkinson disease (autosomal recessive, early onset) 7                                       | Park7              | Yes |
| 541 | BG673589  | paxillin                                                                                     | Pxn                | Yes |
| 542 | AI009656  | PEF protein with a long N-terminal hydrophobic domain                                        | Peflin             | Yes |
| 543 | BI291292  | peptidylprolyl isomerase C                                                                   | Ppic               | Yes |
| 544 | AA957342  | peptidylprolyl isomerase D (cyclophilin D)                                                   | Ppid               | Yes |
| 545 | U68544    | peptidylprolyl isomerase F (cyclophilin F)                                                   | Ppif               | Yes |
| 546 | NM_017330 | perforin 1 (pore forming protein)                                                            | Prf1               | Yes |
| 547 | NM_017169 | peroxiredoxin 2                                                                              | Prdx2              | Yes |
| 548 | NM_013196 | peroxisome proliferator activated receptor alpha                                             | Ppara              | No  |
| 549 | U75918    | Peroxisome proliferator activated receptor delta                                             | Ppard              | Yes |
| 550 | NM_013124 | peroxisome proliferator activated receptor gamma                                             | Pparg              | Yes |
| 551 | AI598971  | PERP, TP53 apoptosis effector (predicted)                                                    | Perp_predicted     | Yes |
| 552 | NM_021657 | PH domain and leucine rich repeat protein phosphatase                                        | Phlpp              | Yes |
| 553 | NM_031606 | phosphatase and tensin homolog                                                               | Pten               | Yes |
| 554 | NM_053923 | phosphatidylinositol 3-kinase, C2 domain containing, gamma polypeptide                       | Pik3ca             | No  |
| 555 | BI290699  | phosphatidylinositol 3-kinase, catalytic, alpha polypeptide                                  | Pik3ca             | Yes |
| 556 | D64048    | phosphatidylinositol 3-kinase, regulatory subunit, polypeptide 1                             | Pik3r1             | Yes |
| 557 | NM_022185 | phosphatidylinositol 3-kinase, regulatory subunit, polypeptide 2                             | Pik3r2             | Yes |
| 558 | AI232697  | phosphatidylserine receptor                                                                  | Ptdsr              | Yes |
| 559 | AI454840  | Phosphodiesterase 1A, calmodulin-dependent                                                   | Pde1a              | No  |
| 560 | AF327906  | phosphodiesterase 1B, Ca2+calmodulin dependent                                               | Pde1b              | No  |
| 561 | NM_022958 | phosphoinositide-3-kinase, class 3                                                           | Pik3c3             | Yes |
| 562 | NM_133551 | phospholipase A2, group IVA (cytosolic, calcium-dependent)                                   | Pla2g4a            | Yes |
| 563 | U51898    | phospholipase A2, group VI                                                                   | Pla2g6             | Yes |
| 564 | U69550    | phospholipase D1                                                                             | Pld1               | Yes |
| 565 | BE112895  | phosphoprotein enriched in astrocytes 15                                                     | Pea15              | Yes |
| 566 | NM_053491 | plasminogen                                                                                  | Plg                | No  |
| 567 | NM_013151 | plasminogen activator, tissue                                                                | Plat               | Yes |
| 568 | NM_013085 | plasminogen activator, urokinase                                                             | Plau               | Yes |
| 569 | AF007789  | plasminogen activator, urokinase receptor                                                    | Plaur              | Yes |
| 570 | BE100812  | platelet derived growth factor, alpha                                                        | Pdgfa              | Yes |
| 571 | BM392366  | platelet-activating factor acetylhydrolase, isoform 1b, alpha2 subunit                       | Pafah1b2           | Yes |
| 572 | AI009219  | Pleckstrin homology domain containing, family A member 5                                     | Plekha5            | Yes |
| 573 | NM_017180 | pleckstrin homology-like domain, family A, member 1                                          | Phlda1             | Yes |
| 574 | NM_012760 | pleiomorphic adenoma gene-like 1                                                             | Plagl1             | Yes |

|     |              |                                                                                              |                   |     |
|-----|--------------|----------------------------------------------------------------------------------------------|-------------------|-----|
| 575 | AB019366     | poly (ADP-ribose) glycohydrolase                                                             | Parp1             | No  |
| 576 | NM_013063    | poly (ADP-ribose) polymerase family, member 1                                                | Parp1             | Yes |
| 577 | NM_017141    | polymerase (DNA directed), beta                                                              | Polb              | Yes |
| 578 | AW531224     | polymerase (RNA) II (DNA directed) polypeptide A (mapped)                                    | Polr2a_mapped     | Yes |
| 579 | AW435212     | potassium channel, subfamily K, member 3                                                     | Kcnk3             | No  |
| 580 | NM_053405    | potassium channel, subfamily K, member 9                                                     | Kcnk9             | No  |
| 581 | NM_013186    | potassium voltage gated channel, Shab-related subfamily, member 1                            | Kcnb1             | Yes |
| 582 | BM385544     | presenilin 1                                                                                 | Psen1             | Yes |
| 583 | AB004454     | presenilin 2                                                                                 | Psen2             | Yes |
| 584 | AI232272     | presenilin enhancer 2 homolog (C. elegans)                                                   | Psenen            | Yes |
| 585 | BI278802     | prion protein                                                                                | Prnp              | Yes |
| 586 | U05989       | PRKC, apoptosis, WT1, regulator                                                              | Pawr              | Yes |
| 587 | BI285575     | procollagen, type 1, alpha 1                                                                 | Col1a1            | Yes |
| 588 | BE108058     | procollagen, type XVIII, alpha 1                                                             | Col18a1           | Yes |
| 589 | AI599419     | Progesterone receptor                                                                        | Pgr               | No  |
| 590 | AI704628     | programmed cell death 2                                                                      | Pdcd2             | Yes |
| 591 | NM_022265    | programmed cell death 4                                                                      | Pdcd4             | Yes |
| 592 | BF408447     | programmed cell death 5 (predicted)                                                          | Pdcd5_predicted   | Yes |
| 593 | BI296393     | programmed cell death 6 (predicted)                                                          | Pdcd6_predicted   | Yes |
| 594 | BE328942     | programmed cell death 6 interacting protein                                                  | Pdcd6ip           | Yes |
| 595 | AF262320     | programmed cell death 8                                                                      | Pdcd8             | Yes |
| 596 | AI013847     | programmed cell death protein 7 (predicted)                                                  | Pdcd7_predicted   | Yes |
| 597 | BI282863     | prohibitin                                                                                   | Phb               | Yes |
| 598 | NM_012629    | prolactin                                                                                    | Prl               | No  |
| 599 | L48060       | prolactin receptor                                                                           | Prlr              | No  |
| 600 | BI290159     | proline-serine-threonine phosphatase-interacting protein 1 (predicted)                       | Pstpip1_predicted | Yes |
| 601 | NM_138857    | prominin 2                                                                                   | Prom2             | No  |
| 602 | NM_031644    | prostaglandin D2 synthase 2                                                                  | Ptgds2            | Yes |
| 603 | U03389       | prostaglandin-endoperoxide synthase 2                                                        | Ptgs2             | Yes |
| 604 | AI600136     | protease, serine, 25                                                                         | Prss25            | Yes |
| 605 | NM_031978    | proteasome (prosome, macropain) 26S subunit, non-ATPase, 1                                   | Psm1              | Yes |
| 606 | NM_130430    | proteasome (prosome, macropain) 26S subunit, non-ATPase, 9                                   | Psm9              | Yes |
| 607 | NM_012803    | protein C                                                                                    | Prc               | No  |
| 608 | AI639478     | protein disulfide isomerase associated 2 (predicted)                                         | Pdia2_predicted   | No  |
| 609 | NM_017319    | protein disulfide isomerase associated 3                                                     | Pdia3             | Yes |
| 610 | BF415343     | protein kinase C, alpha                                                                      | Prkca             | Yes |
| 611 | X04440       | protein kinase C, beta 1                                                                     | Prkcb1            | Yes |
| 612 | NM_133307    | protein kinase C, delta                                                                      | Prkcd             | Yes |
| 613 | AA799421     | protein kinase C, epsilon                                                                    | Prkce             | Yes |
| 614 | 1370197_a_at | protein kinase C, zeta                                                                       | Prkcz             | Yes |
| 615 | NM_019142    | protein kinase, AMP-activated, alpha 1 catalytic subunit                                     | Prkaa1            | Yes |
| 616 | NM_023991    | protein kinase, AMP-activated, alpha 2 catalytic subunit                                     | Prkaa2            | Yes |
| 617 | NM_013012    | protein kinase, cGMP-dependent, type II                                                      | Prkg2             | No  |
| 618 | BF400782     | protein kinase, DNA activated, catalytic polypeptide (predicted)                             | Prkdc_predicted   | Yes |
| 619 | NM_019335    | Protein kinase, interferon-inducible double stranded RNA dependent                           | Prkr              | Yes |
| 620 | NM_031527    | protein phosphatase 1, catalytic subunit, alpha isoform                                      | Ppp1ca            | Yes |
| 621 | NM_013065    | protein phosphatase 1, catalytic subunit, beta isoform                                       | Ppp1cb            | Yes |
| 622 | NM_022676    | protein phosphatase 1, regulatory (inhibitor) subunit 1A                                     | Ppp1rA            | No  |
| 623 | AI172276     | protein phosphatase 1, regulatory (inhibitor) subunit 2                                      | Ppp1r2            | Yes |
| 624 | AB023634     | protein phosphatase 1F (PP2C domain containing)                                              | Ppm1f             | Yes |
| 625 | BF408792     | protein phosphatase 2 (formerly 2A), catalytic subunit, alpha isoform                        | Ppp2ca            | Yes |
| 626 | NM_017040    | protein phosphatase 2 (formerly 2A), catalytic subunit, beta isoform                         | Ppp2cb            | Yes |
| 627 | AA800669     | protein phosphatase 2 (formerly 2A), regulatory subunit A (PR 65), alpha isoform             | Ppp2r1a           | Yes |
| 628 | 1373959_at   | protein phosphatase 2 (formerly 2A), regulatory subunit A (PR 65), beta isoform              | Ppp2r1b           | Yes |
| 629 | AI717081     | protein phosphatase 2 (formerly 2A), regulatory subunit B (PR 52), alpha isoform             | Ppp2r2a           | Yes |
| 630 | BE113127     | Protein phosphatase 3, catalytic subunit, alpha isoform                                      | Ppp3ca            | Yes |
| 631 | NM_031729    | protein phosphatase 5, catalytic subunit                                                     | Ppp5c             | Yes |
| 632 | U06230       | protein S (alpha)                                                                            | Pros1             | No  |
| 633 | U69109       | protein tyrosine kinase 2 beta                                                               | Ptk2b             | Yes |
| 634 | NM_012637    | protein tyrosine phosphatase, non-receptor type 1                                            | Ptpn1             | Yes |
| 635 | AI172465     | Protein tyrosine phosphatase, non-receptor type 11                                           | Ptpn11            | Yes |
| 636 | NM_053908    | protein tyrosine phosphatase, non-receptor type 6                                            | Ptpn6             | Yes |
| 637 | M10072       | protein tyrosine phosphatase, receptor type, C                                               | Ptprc             | Yes |
| 638 | NM_022925    | protein tyrosine phosphatase, receptor type, Q /// hypothetical gene supported by NM_022925; | Ptprq             | No  |
| 639 | AI178772     | prothymosin alpha                                                                            | Ptma              | Yes |

|     |           |                                                                                             |                  |     |
|-----|-----------|---------------------------------------------------------------------------------------------|------------------|-----|
| 640 | NM_017034 | proviral integration site 1                                                                 | Pim1             | Yes |
| 641 | BI294798  | PTK2 protein tyrosine kinase 2                                                              | Ptk2             | Yes |
| 642 | AF231010  | purinergic receptor P2X, ligand-gated ion channel, 1                                        | P2rx1            | Yes |
| 643 | AF020757  | purinergic receptor P2X, ligand-gated ion channel, 2                                        | P2rx2            | No  |
| 644 | NM_019256 | purinergic receptor P2X, ligand-gated ion channel, 7                                        | P2rx7            | No  |
| 645 | NM_017255 | purinergic receptor P2Y, G-protein coupled 2                                                | P2ry2            | Yes |
| 646 | BI282953  | PYD and CARD domain containing                                                              | Pycard           | Yes |
| 647 | NM_013018 | RAB3A, member RAS oncogene family                                                           | Rab3a            | Yes |
| 648 | U70777    | rabaptin, RAB GTPase binding effector protein 1                                             | Rabep1           | Yes |
| 649 | AJ249986  | Rap guanine nucleotide exchange factor (GEF) 1                                              | Rapgef1          | Yes |
| 650 | AF002251  | Ras association (RalGDS/AF-6) domain family 5                                               | Rassf5           | Yes |
| 651 | AF081196  | RAS guanyl releasing protein 1                                                              | Rasgrp2          | No  |
| 652 | AI408053  | ras homolog gene family, member A                                                           | Rhoa             | Yes |
| 653 | NM_022542 | ras homolog gene family, member B                                                           | Rhob             | Yes |
| 654 | NM_013135 | RAS p21 protein activator 1                                                                 | Rasa1            | Yes |
| 655 | BF414025  | Ras-induced senescence 1                                                                    | Ris1             | No  |
| 656 | AA799542  | Ras-related C3 botulinum toxin substrate 1                                                  | Rac1             | Yes |
| 657 | AF036537  | receptor-interacting serine-threonine kinase 3                                              | Ripk3            | Yes |
| 658 | NM_012641 | regenerating islet-derived 1                                                                | Reg1             | No  |
| 659 | L20869    | regenerating islet-derived 3 gamma                                                          | Reg3g            | No  |
| 660 | NM_031546 | regucalcin                                                                                  | Rgn              | Yes |
| 661 | AJ299017  | ret proto-oncogene                                                                          | Ret              | Yes |
| 662 | AF051335  | reticulon 4                                                                                 | Rtn4             | Yes |
| 663 | AI178012  | retinoblastoma 1                                                                            | Rb1              | Yes |
| 664 | NM_031094 | retinoblastoma-like 2                                                                       | Rbl2             | Yes |
| 665 | NM_031528 | retinoic acid receptor, alpha                                                               | Rara             | Yes |
| 666 | BF419646  | retinoic acid receptor, beta                                                                | Rarb             | Yes |
| 667 | BI285959  | retinoid X receptor alpha                                                                   | Rxra             | Yes |
| 668 | AI408677  | Rho GDP dissociation inhibitor (GDI) alpha                                                  | Arhgdia          | Yes |
| 669 | NM_031098 | Rho-associated coiled-coil forming kinase 1                                                 | Rock1            | No  |
| 670 | NM_013022 | Rho-associated coiled-coil forming kinase 2                                                 | Rock2            | Yes |
| 671 | NM_022510 | ribosomal protein L4                                                                        | Rpl4             | Yes |
| 672 | BI282255  | ribosomal protein S5                                                                        | Rps5             | Yes |
| 673 | M57428    | ribosomal protein S6 kinase, polypeptide 1                                                  | Rps6kb1          | Yes |
| 674 | AI179991  | ring finger protein 34                                                                      | Rnf34            | Yes |
| 675 | AA858518  | ring finger protein 7 (predicted)                                                           | Rnf7_predicted   | Yes |
| 676 | AI175966  | Rous sarcoma oncogene                                                                       | Src              | Yes |
| 677 | BF403180  | Runt related transcription factor 2                                                         | Runx2            | No  |
| 678 | NM_012618 | S100 calcium-binding protein A4                                                             | S100a4           | Yes |
| 679 | NM_013191 | S100 protein, beta polypeptide                                                              | S100b            | Yes |
| 680 | AA850867  | sarcoglycan, gamma (dystrophin-associated glycoprotein)                                     | Sgcg             | Yes |
| 681 | NM_031541 | scavenger receptor class B, member 1                                                        | Scarb1           | Yes |
| 682 | BI294932  | SCF apoptosis response protein 1                                                            | LOC499941        | Yes |
| 683 | NM_053687 | schlafen 3                                                                                  | Slfn3            | Yes |
| 684 | BF394953  | SDA1 domain containing 1                                                                    | Sdad1            | Yes |
| 685 | NM_019364 | sec1 family domain containing 1                                                             | Scfd1            | Yes |
| 686 | AF220608  | secreted frizzled-related protein 4                                                         | Sfrp4            | No  |
| 687 | AB001382  | secreted phosphoprotein 1                                                                   | Spp1             | Yes |
| 688 | NM_017310 | sema domain, Ig domain, short basic domain, secreted, (semaphorin) 3A                       | Sema3a           | No  |
| 689 | BI299759  | sema domain, transmembrane domain (TM), and cytoplasmic domain, (semaphorin) 6A (predicted) | Sema6a_predicted | No  |
| 690 | NM_133291 | seminal vesicle antigen-like 2                                                              | Sval2            | No  |
| 691 | M25590    | seminal vesicle protein 4                                                                   | Svp4             | No  |
| 692 | BG663093  | sequestosome 1                                                                              | Sqstm1           | Yes |
| 693 | NM_012620 | serine (or cysteine) peptidase inhibitor, clade E, member 1                                 | Serpine1         | Yes |
| 694 | NM_021696 | serine (or cysteine) proteinase inhibitor, clade B, member 2                                | Serpine2         | No  |
| 695 | AA944455  | serine incorporator 3                                                                       | Serinc3          | Yes |
| 696 | NM_133392 | serine/threonine kinase 17b (apoptosis-inducing)                                            | Stk17b           | Yes |
| 697 | NM_019349 | serine/threonine kinase 2                                                                   | Stk2             | No  |
| 698 | NM_031735 | serine/threonine kinase 3 (STE20 homolog, yeast)                                            | Stk3             | Yes |
| 699 | AF388527  | Serpine1 mRNA binding protein 1                                                             | Serbp1           | Yes |
| 700 | NM_017170 | serum amyloid P-component                                                                   | Apcs             | No  |
| 701 | NM_019232 | serum/glucocorticoid regulated kinase                                                       | Sgk              | Yes |
| 702 | NM_080905 | seven in absentia 1A                                                                        | Siah1a           | Yes |
| 703 | NM_134457 | seven in absentia 2                                                                         | Siah2            | No  |
| 704 | NM_012650 | sex hormone binding globulin                                                                | Shbg             | No  |
| 705 | BF284481  | SH3-domain GRB2-like B1 (endophilin)                                                        | Sh3glb1          | Yes |

|     |           |                                                                                                                                           |                      |     |
|-----|-----------|-------------------------------------------------------------------------------------------------------------------------------------------|----------------------|-----|
| 706 | AF255888  | SH3-domain kinase binding protein 1                                                                                                       | Sh3kbp1              | Yes |
| 707 | BF550890  | sialophorin                                                                                                                               | Spn                  | Yes |
| 708 | NM_032612 | signal transducer and activator of transcription 1                                                                                        | Stat1                | Yes |
| 709 | BI285863  | signal transducer and activator of transcription 3                                                                                        | Stat3                | Yes |
| 710 | NM_017064 | signal transducer and activator of transcription 5A                                                                                       | Stat5a               | Yes |
| 711 | AI177626  | signal transducer and activator of transcription 5B                                                                                       | Stat5b               | Yes |
| 712 | BE110607  | similar to apoptosis related protein APR-3; p18 protein (predicted)                                                                       | RGD1311605_predicted | Yes |
| 713 | BF396386  | similar to cell division cycle and apoptosis regulator 1 (predicted)                                                                      | RGD1560358_predicted | Yes |
| 714 | BI296385  | similar to chemokine (C-X-C motif) ligand 16                                                                                              | Cxcl16               | Yes |
| 715 | BI294745  | similar to livin inhibitor of apoptosis isoform beta (predicted)                                                                          | RGD1562883_predicted | No  |
| 716 | NM_021846 | similar to MAP/microtubule affinity-regulating kinase 4 (MAP/microtubule affinity-regulating kinase like 1) (predicted)                   | RGD1561096_predicted | Yes |
| 717 | AA848545  | similar to programmed cell death 10                                                                                                       | MGC72992             | Yes |
| 718 | BF282636  | similar to RIKEN cDNA 1700023M03                                                                                                          | RGD1305457           | Yes |
| 719 | AW254416  | Similar to TGF-beta induced apoptosis protein 12 (predicted)                                                                              | RGD1308916_predicted | No  |
| 720 | AA946199  | snail homolog 1 (Drosophila)                                                                                                              | Snai1                | Yes |
| 721 | X89383    | SNF related kinase                                                                                                                        | Snrk                 | No  |
| 722 | NM_012647 | sodium channel, voltage-gated, type 2, alpha 1 polypeptide                                                                                | Scn2a                | No  |
| 723 | NM_013178 | sodium channel, voltage-gated, type IV, alpha polypeptide                                                                                 | Scn4a                | No  |
| 724 | BI284218  | solute carrier family 2 (facilitated glucose transporter), member 1                                                                       | Slc2a1               | Yes |
| 725 | NM_017102 | solute carrier family 2 (facilitated glucose transporter), member 3                                                                       | Slc2a3               | Yes |
| 726 | NM_017223 | solute carrier family 20, member 2                                                                                                        | Slc20a2              | Yes |
| 727 | BG666999  | solute carrier family 25 (mitochondrial carrier; adenine nucleotide translocator), member 4                                               | Slc25a4              | Yes |
| 728 | NM_017206 | solute carrier family 6 (neurotransmitter transporter, taurine), member 6                                                                 | Slc6a6               | Yes |
| 729 | NM_053442 | solute carrier family 7 (cationic amino acid transporter, y+ system), member 8 /// synaptic Ras GTPase activating protein 1 homolog (rat) | Slc7a8 /// Syngap1   | Yes |
| 730 | U04933    | solute carrier family 8 (sodium/calcium exchanger), member 1                                                                              | Slc7a8 /// Syngap1   | No  |
| 731 | NM_133522 | somatostatin receptor 3 /// hypothetical gene supported by NM_133522                                                                      | SSTR                 | No  |
| 732 | BI275248  | Son cell proliferation protein                                                                                                            | Son                  | Yes |
| 733 | NM_017221 | sonic hedgehog homolog (Drosophila)                                                                                                       | Shh                  | No  |
| 734 | NM_012655 | Sp1 transcription factor                                                                                                                  | Sp1                  | Yes |
| 735 | AB049572  | sphingosine kinase 1                                                                                                                      | Sphk1                | Yes |
| 736 | BM386306  | sphingosine kinase 2                                                                                                                      | Sphk2                | Yes |
| 737 | AI169638  | sphingosine-1-phosphate phosphatase 1                                                                                                     | Sgpp1                | Yes |
| 738 | U53883    | ST8 alpha-N-acetyl-neuraminide alpha-2,8-sialyltransferase 1                                                                              | ST8sia2              | No  |
| 739 | AY083159  | Stam binding protein                                                                                                                      | Stamp                | Yes |
| 740 | BM386683  | stanniocalcin 1                                                                                                                           | Stc1                 | Yes |
| 741 | NM_022230 | stanniocalcin 2                                                                                                                           | Stc2                 | Yes |
| 742 | NM_017166 | stathmin 1                                                                                                                                | Stmn1                | Yes |
| 743 | AF335281  | STEAP family member 3                                                                                                                     | Steap3               | Yes |
| 744 | AI235465  | steroid sensitive gene 1                                                                                                                  | Ssg1                 | Yes |
| 745 | AI009817  | succinate dehydrogenase complex, subunit C, integral membrane protein                                                                     | Sdhc                 | Yes |
| 746 | NM_134378 | sulfatase 1                                                                                                                               | Sdhc                 | No  |
| 747 | NM_017050 | superoxide dismutase 1                                                                                                                    | Sod1                 | Yes |
| 748 | BG671549  | superoxide dismutase 2, mitochondrial                                                                                                     | Sod2                 | Yes |
| 749 | NM_058208 | suppressor of cytokine signaling 2                                                                                                        | Socs2                | Yes |
| 750 | NM_053565 | suppressor of cytokine signaling 3                                                                                                        | Socs3                | Yes |
| 751 | BM390864  | survival motor neuron domain containing 1                                                                                                 | Snmnc1               | Yes |
| 752 | AI170385  | SWI/SNF related, matrix associated, actin dependent regulator of chromatin, subfamily a, member 2                                         | Smarca2              | Yes |
| 753 | BE329013  | SWI/SNF related, matrix associated, actin dependent regulator of chromatin, subfamily a, member 4                                         | Smarca4              | Yes |
| 754 | NM_053442 | synaptic Ras GTPase activating protein 1 homolog (rat)                                                                                    | Syngap1              | No  |
| 755 | NM_013026 | syndecan 1                                                                                                                                | Sdc1                 | Yes |
| 756 | AA946430  | synovial apoptosis inhibitor 1, synoviolin                                                                                                | Syvn1                | Yes |
| 757 | NM_019169 | synuclein, alpha                                                                                                                          | Snc1                 | No  |
| 758 | BG671061  | tachykinin 1                                                                                                                              | Tac1                 | No  |
| 759 | BM392226  | TAF10 RNA polymerase II, TATA box binding protein (TBP)-associated factor (predicted)                                                     | Taf10_predicted      | Yes |
| 760 | NM_133615 | TAF9-like RNA polymerase II, TATA box binding protein (TBP)-associated factor, 31kDa                                                      | Taf9l                | Yes |
| 761 | AI228250  | Tax1 (human T-cell leukemia virus type I) binding protein 1                                                                               | Tax1bp1              | Yes |
| 762 | AA957545  | T-box 3                                                                                                                                   | Tbx3                 | Yes |
| 763 | AB029495  | TCF3 (E2A) fusion partner                                                                                                                 | Tfpt                 | Yes |
| 764 | AF247818  | telomerase reverse transcriptase                                                                                                          | Tert                 | No  |
| 765 | NM_019381 | testis enhanced gene transcript                                                                                                           | Tegt                 | Yes |
| 766 | NM_133396 | testis-specific kinase 2                                                                                                                  | Tesk2                | Yes |
| 767 | AA943723  | THAP domain containing, apoptosis associated protein 3 (predicted)                                                                        | Thap3_predicted      | Yes |
| 768 | NM_053800 | thioredoxin 1                                                                                                                             | Txn1                 | Yes |
| 769 | AA800180  | thioredoxin 2                                                                                                                             | Txn2                 | Yes |
| 770 | BM390196  | thioredoxin domain containing 5 (predicted)                                                                                               | Txndc5_predicted     | Yes |

|     |            |                                                                                                                                           |                     |     |
|-----|------------|-------------------------------------------------------------------------------------------------------------------------------------------|---------------------|-----|
| 771 | BF555110   | thioredoxin-like 1                                                                                                                        | Txn1l               | Yes |
| 772 | BM384228   | THO complex 1                                                                                                                             | Thoc1               | Yes |
| 773 | AA998057   | thymoma viral proto-oncogene 1                                                                                                            | Akt1                | Yes |
| 774 | AI105076   | Thymoma viral proto-oncogene 2                                                                                                            | Akt2                | Yes |
| 775 | NM_031575  | thymoma viral proto-oncogene 3                                                                                                            | Akt3                | Yes |
| 776 | AI145313   | thymus cell antigen 1, theta                                                                                                              | Thy1                | No  |
| 777 | NM_012888  | thyroid stimulating hormone receptor                                                                                                      | Tshr                | No  |
| 778 | AI101391   | Tial1 cytotoxic granule-associated RNA binding protein-like 1 (mapped)                                                                    | Tial1               | No  |
| 779 | NM_053819  | tissue inhibitor of metalloproteinase 1                                                                                                   | Timp1               | Yes |
| 780 | NM_021989  | tissue inhibitor of metalloproteinase 2                                                                                                   | Timp2               | Yes |
| 781 | NM_012886  | Tissue inhibitor of metalloproteinase 3 (Sorsby fundus dystrophy, pseudoinflammatory)                                                     | Timp3               | Yes |
| 782 | AI104533   | titin                                                                                                                                     | Ttn                 | Yes |
| 783 | BI287742   | TM2 domain containing 1 (predicted)                                                                                                       | Tm2d1_predicted     | Yes |
| 784 | BM389034   | TNF receptor-associated protein 1                                                                                                         | Trap1               | Yes |
| 785 | BM386846   | TNFRSF1A-associated via death domain                                                                                                      | Tradd               | Yes |
| 786 | AF057025   | toll-like receptor 4                                                                                                                      | Tlr4                | Yes |
| 787 | AI012419   | Transcribed locus                                                                                                                         | NS                  | No  |
| 788 | AW533194   | Transcribed locus                                                                                                                         | NS                  | No  |
| 789 | AI104523   | Transcribed locus                                                                                                                         | NS                  | No  |
| 790 | AW251860   | transcription factor 7, T-cell specific (predicted)                                                                                       | Tcf7_predicted      | Yes |
| 791 | NM_031326  | transcription factor A, mitochondrial                                                                                                     | Tfam                | Yes |
| 792 | BI284455   | transcription factor Pur-beta                                                                                                             | pur-beta            | Yes |
| 793 | NM_133317  | transducer of ErbB-2.1                                                                                                                    | Tob1                | Yes |
| 794 | M58040     | transferrin receptor                                                                                                                      | Tfrc                | Yes |
| 795 | BI297236   | Transformation related protein 53 inducible nuclear protein 1                                                                             | Trp53inp2           | No  |
| 796 | AJ277449   | transformation related protein 63                                                                                                         | Trp63               | No  |
| 797 | NM_012671  | transforming growth factor alpha                                                                                                          | Tgfa                | Yes |
| 798 | AW254561   | transforming growth factor beta regulated gene 4                                                                                          | Tbrg4               | Yes |
| 799 | 1370082_at | transforming growth factor, beta 1                                                                                                        | Tgfb1               | Yes |
| 800 | BF420705   | transforming growth factor, beta 2                                                                                                        | Tgfb2               | Yes |
| 801 | NM_012775  | transforming growth factor, beta receptor 1                                                                                               | Tgfr1               | Yes |
| 802 | BI275994   | transglutaminase 2, C polypeptide                                                                                                         | Tgm2                | Yes |
| 803 | AB015231   | transient receptor potential cation channel, subfamily V, member 1                                                                        | Trpv1               | No  |
| 804 | NM_023970  | transient receptor potential cation channel, subfamily V, member 4 /// transient receptor potential cation channel, subfamily V, member 1 | Trpv4               | No  |
| 805 | AB020967   | tribbles homolog 3 (Drosophila)                                                                                                           | Trib3               | Yes |
| 806 | NM_080903  | tripartite motif protein 63                                                                                                               | Trim63              | Yes |
| 807 | AI104913   | tropomodulin 1                                                                                                                            | Tmod1               | Yes |
| 808 | NM_031345  | TSC22 domain family 3                                                                                                                     | Tsc22d3             | Yes |
| 809 | BI285434   | tubulin, alpha 1 /// tubulin, alpha 6 /// similar to Tubulin alpha-2 chain (Alpha-tubulin 2) (predicted)                                  | Tuba1 /// Tuba6     | Yes |
| 810 | BI285434   | tubulin, gamma 1                                                                                                                          | Tubg1               | Yes |
| 811 | AA819227   | tumor necrosis factor (TNF superfamily, member 2)                                                                                         | Tnf                 | Yes |
| 812 | BF283688   | tumor necrosis factor ligand superfamily member 12                                                                                        | Tnfsf12             | Yes |
| 813 | NM_012870  | tumor necrosis factor receptor superfamily, member 11b (osteoprotegerin)                                                                  | Tnfrsf11b           | Yes |
| 814 | BI303379   | tumor necrosis factor receptor superfamily, member 12a                                                                                    | Tnfrsf12a           | Yes |
| 815 | AI169601   | tumor necrosis factor receptor superfamily, member 14 (herpesvirus entry mediator)                                                        | Tnfrsf14            | Yes |
| 816 | NM_013091  | tumor necrosis factor receptor superfamily, member 1a                                                                                     | Tnfrsf1a            | Yes |
| 817 | NM_013049  | tumor necrosis factor receptor superfamily, member 4                                                                                      | Tnfrsf4             | No  |
| 818 | AW433947   | tumor necrosis factor receptor superfamily, member 5                                                                                      | Tnfrsf5             | Yes |
| 819 | NM_139194  | Tumor necrosis factor receptor superfamily, member 6                                                                                      | Tnfrsf6             | No  |
| 820 | BM387084   | tumor necrosis factor superfamily, member 5-induced protein 1 (predicted)                                                                 | Tnfsf5ip1_predicted | Yes |
| 821 | AY009504   | tumor protein p53                                                                                                                         | Tp53                | Yes |
| 822 | NM_053867  | tumor protein, translationally-controlled 1                                                                                               | Tpt1                | Yes |
| 823 | BG057543   | tumor rejection antigen gp96 (predicted)                                                                                                  | Tra1_predicted      | Yes |
| 824 | AI234654   | tumor susceptibility gene 101                                                                                                             | Tsg101              | Yes |
| 825 | NM_013052  | tyrosine 3-monooxygenase/tryptophan 5-monooxygenase activation protein, eta polypeptide                                                   | Ywhah               | Yes |
| 826 | NM_019376  | tyrosine 3-monooxygenase/tryptophan 5-monooxygenase activation protein, gamma polypeptide                                                 | Ywhag               | Yes |
| 827 | BF281342   | tyrosine 3-monooxygenase/tryptophan 5-monooxygenase activation protein, theta polypeptide                                                 | Ywhaq               | Yes |
| 828 | AI228292   | tyrosine hydroxylase                                                                                                                      | Th                  | No  |
| 829 | AI407490   | tyrosyl-tRNA synthetase                                                                                                                   | Yars                | Yes |
| 830 | NM_053747  | Ubiquilin 1                                                                                                                               | Ubqln1              | Yes |
| 831 | BI276086   | Ubiquitin specific protease 7 (herpes virus-associated)                                                                                   | Usp7                | Yes |
| 832 | BI296848   | ubiquitination factor E4B, UFD2 homolog (S. cerevisiae) (predicted)                                                                       | Ube4b_predicted     | Yes |
| 833 | AI102437   | ubiquitin-like 1 (sentrin) activating enzyme E1B                                                                                          | Uble1b              | Yes |
| 834 | AF159706   | unc-13 homolog B (C. elegans)                                                                                                             | Unc13b              | No  |
| 835 | NM_022206  | unc-5 homolog A (C. elegans)                                                                                                              | Unc5a               | No  |

|     |           |                                                                                                                                   |                                  |     |
|-----|-----------|-----------------------------------------------------------------------------------------------------------------------------------|----------------------------------|-----|
| 836 | NM_022207 | unc-5 homolog B (C. elegans)                                                                                                      | Unc5b                            | No  |
| 837 | BM388453  | uncharacterized protein family UPF0227 member RGD1359682                                                                          | RGD1359682                       | Yes |
| 838 | U30789    | upregulated by 1,25-dihydroxyvitamin D-3                                                                                          | Txnip                            | Yes |
| 839 | NM_053864 | valosin-containing protein                                                                                                        | Vcp                              | Yes |
| 840 | AF080594  | vascular endothelial growth factor A                                                                                              | Vegfa                            | Yes |
| 841 | NM_012759 | vav 1 oncogene                                                                                                                    | Vav1                             | Yes |
| 842 | NM_021687 | v-erb-a erythroblastic leukemia viral oncogene homolog 4 (avian)                                                                  | ErbB4                            | No  |
| 843 | NM_017003 | v-erb-b2 erythroblastic leukemia viral oncogene homolog 2, neuro/glioblastoma derived oncogene homolog (avian)                    | ErbB2                            | No  |
| 844 | NM_012555 | v-ets erythroblastosis virus E26 oncogene homolog 1 (avian)                                                                       | Ets1                             | No  |
| 845 | NM_031140 | vimentin                                                                                                                          | Vim                              | Yes |
| 846 | AF268467  | voltage-dependent anion channel 1                                                                                                 | Vdac1                            | No  |
| 847 | NM_012639 | v-raf-1 murine leukemia viral oncogene homolog 1                                                                                  | Raf1                             | Yes |
| 848 | BF283772  | v-rel reticuloendotheliosis viral oncogene homolog A (avian)                                                                      | Rela                             | Yes |
| 849 | NM_022548 | wild-type p53-induced gene 1                                                                                                      | Wig1                             | Yes |
| 850 | NM_031534 | Wilms tumor 1                                                                                                                     | Wt1                              | No  |
| 851 | NM_031590 | WNT1 inducible signaling pathway protein 2                                                                                        | Wisp2                            | Yes |
| 852 | BI300732  | WW domain-containing oxidoreductase (predicted)                                                                                   | RGD1565791_predicted             | No  |
| 853 | BI282111  | Y box protein 1 related, pseudogene 3 /// similar to nuclease sensitive element binding protein 1 (predicted) /// Y box protein 1 | RGD1560265_predicted<br>/// Ybx1 | No  |
| 854 | NM_031615 | zinc finger protein 148                                                                                                           | Zfp148                           | Yes |
| 855 | BE109605  | zinc finger protein 162                                                                                                           | Zfp162                           | Yes |
| 856 | BE111799  | Zinc finger protein 346 (predicted)                                                                                               | Zfp346_predicted                 | No  |
| 857 | BM392399  | zinc finger protein 622                                                                                                           | Zfp622                           | Yes |
| 858 | AA819804  | Zinc finger protein 91                                                                                                            | Zfp91                            | Yes |
| 859 | BI289543  | zinc finger, MYND domain containing 11                                                                                            | Zmynd11                          | Yes |
| 860 | AI317860  | zinc responsive protein ZD7                                                                                                       | LOC474154                        | Yes |

\* Signal detected above background for gene probeset in 20% or more of the chips.
