# Supplementary material
Source: PubMed Central journal article supplement (PMC5350783)
Supplement: CTS-2-41_002.pdf [file CTS-2-41_002.pdf]

**Supplemental Material-Table 2. Apoptosis-related genes whose expression is altered in trauma/HS by two-fold or more.**

| mRNA Probeset Number                                                                    | Gene Name*                                                                                                            | Gene Symbol        | SBR50 vs. Sham |                  | SBR50/IL-6 vs. SBR50 |                  | SBR50/IL-6/G vs. SBR50/IL-6 |                  |
|-----------------------------------------------------------------------------------------|-----------------------------------------------------------------------------------------------------------------------|--------------------|----------------|------------------|----------------------|------------------|-----------------------------|------------------|
|                                                                                         |                                                                                                                       |                    | Fold P/Sham    | FDR <sup>+</sup> | Fold IL-6/P          | FDR <sup>+</sup> | Fold G/IL-6                 | FDR <sup>+</sup> |
| <b>GROUP IA GENES INCREASED IN SBR50 vs. SHAM AND DECREASED IN SBR50/IL-6 vs. SBR50</b> |                                                                                                                       |                    |                |                  |                      |                  |                             |                  |
| 1369191_at                                                                              | interleukin 6                                                                                                         | Il6                | 96.34          | 0.0000           | 0.19                 | 0.0000           | 3.77                        | 0.0000           |
| 1367973_at                                                                              | chemokine (C-C motif) ligand 2                                                                                        | Ccl2               | 47.34          | 0.0000           | 0.10                 | 0.0000           | 3.03                        | 0.0000           |
| 1371237_at                                                                              | metallothionein 1a                                                                                                    | Mt1a               | 25.94          | 0.0000           | 0.77                 | 0.0029           | 1.09                        | 0.3554           |
| 1368519_at                                                                              | serine (or cysteine) peptidase inhibitor, clade E, member 1                                                           | Serpine1           | 16.75          | 0.0000           | 0.48                 | 0.0001           | 1.04                        | 0.8259           |
| 1368108_at                                                                              | ATPase, Ca <sup>++</sup> transporting, cardiac muscle, fast twitch 1                                                  | Atp2a1             | 11.92          | 0.0000           | 0.12                 | 0.0000           | 23.02                       | 0.0000           |
| 1368254_at                                                                              | sphingosine kinase 1                                                                                                  | Sphk1              | 11.54          | 0.0000           | 0.53                 | 0.0012           | 1.15                        | 0.4820           |
| 1368290_at                                                                              | cysteine rich protein 61                                                                                              | Cyr61              | 11.29          | 0.0000           | 0.08                 | 0.0000           | 4.76                        | 0.0000           |
| 1368545_at                                                                              | CASP8 and FADD-like apoptosis regulator                                                                               | Cflar              | 10.68          | 0.0000           | 0.37                 | 0.0005           | 1.48                        | 0.1384           |
| 1369737_at                                                                              | cAMP responsive element modulator                                                                                     | Crem               | 10.27          | 0.0000           | 0.59                 | 0.0001           | 1.90                        | 0.0001           |
| 1367712_at                                                                              | tissue inhibitor of metalloproteinase 1                                                                               | Timp1              | 10.10          | 0.0000           | 0.22                 | 0.0000           | 2.01                        | 0.0000           |
| 1368300_at                                                                              | adenosine A2a receptor                                                                                                | Adora2a            | 9.36           | 0.0000           | 0.40                 | 0.0003           | 2.23                        | 0.0019           |
| 1370173_at                                                                              | superoxide dismutase 2, mitochondrial                                                                                 | Sod2               | 8.53           | 0.0000           | 0.54                 | 0.0000           | 1.48                        | 0.0033           |
| 1368490_at                                                                              | CD14 antigen                                                                                                          | Cd14               | 7.85           | 0.0000           | 0.78                 | 0.0043           | 1.33                        | 0.0030           |
| 1369577_at                                                                              | suppressor of cytokine signaling 2                                                                                    | Socs2              | 7.44           | 0.0000           | 0.71                 | 0.0656           | 1.12                        | 0.6008           |
| 1368731_at                                                                              | orosomucoid 1                                                                                                         | Orm1               | 7.32           | 0.0000           | 0.50                 | 0.0365           | 1.16                        | 0.6906           |
| 1368308_at                                                                              | myelocytomatosis viral oncogene homolog (avian)                                                                       | Myc                | 6.46           | 0.0000           | 0.49                 | 0.0000           | 1.19                        | 0.0763           |
| 1370113_at                                                                              | baculoviral IAP repeat-containing 3                                                                                   | Birc3              | 5.83           | 0.0000           | 0.54                 | 0.0002           | 2.10                        | 0.0001           |
| 1370080_at                                                                              | heme oxygenase (decycling) 1                                                                                          | Hmox1              | 5.17           | 0.0000           | 0.34                 | 0.0000           | 2.15                        | 0.0000           |
| 1367800_at                                                                              | plasminogen activator, tissue                                                                                         | Plat               | 4.21           | 0.0000           | 0.79                 | 0.0016           | 1.28                        | 0.0019           |
| 1383426_at                                                                              | proline-serine-threonine phosphatase-interacting protein 1 (predicted)                                                | Pstpip1_predicted  | 4.18           | 0.0000           | 0.51                 | 0.0000           | 1.15                        | 0.2254           |
| 1370848_at                                                                              | solute carrier family 2 (facilitated glucose transporter), member 1                                                   | Slc2a1             | 4.16           | 0.0000           | 0.54                 | 0.0000           | 1.69                        | 0.0001           |
| 1388924_at                                                                              | angiopoietin-like 4                                                                                                   | Angptl4            | 4.06           | 0.0000           | 0.38                 | 0.0000           | 2.13                        | 0.0002           |
| 1387219_at                                                                              | Adrenomedullin                                                                                                        | Adm                | 3.99           | 0.0000           | 0.60                 | 0.0001           | 0.80                        | 0.0471           |
| 1386908_at                                                                              | glutaredoxin 1 (thioltransferase)                                                                                     | Glrx1              | 3.93           | 0.0000           | 0.57                 | 0.0000           | 1.38                        | 0.0012           |
| 1368238_at                                                                              | pancreatitis-associated protein                                                                                       | Pap                | 3.47           | 0.0000           | 0.53                 | 0.0003           | 1.24                        | 0.1749           |
| 1370174_at                                                                              | myeloid differentiation primary response gene 116                                                                     | Myd116             | 3.35           | 0.0000           | 0.75                 | 0.0245           | 1.11                        | 0.4506           |
| 1369862_at                                                                              | proviral integration site 1                                                                                           | Pim1               | 3.28           | 0.0000           | 0.76                 | 0.0693           | 1.34                        | 0.0691           |
| 1387354_at                                                                              | signal transducer and activator of transcription 1                                                                    | Stat1              | 3.26           | 0.0000           | 0.27                 | 0.0000           | 1.41                        | 0.0008           |
| 1390704_at                                                                              | SDA1 domain containing 1                                                                                              | Sdad1              | 3.14           | 0.0000           | 0.37                 | 0.0001           | 1.13                        | 0.5990           |
| 1368856_at                                                                              | Janus kinase 2                                                                                                        | Jak2               | 2.91           | 0.0000           | 0.50                 | 0.0000           | 1.52                        | 0.0006           |
| 1370224_at                                                                              | signal transducer and activator of transcription 3                                                                    | Stat3              | 2.84           | 0.0000           | 0.76                 | 0.0456           | 1.34                        | 0.0500           |
| 1369181_at                                                                              | cytochrome b-245, beta polypeptide                                                                                    | Cybb               | 2.76           | 0.0000           | 0.48                 | 0.0000           | 1.14                        | 0.3116           |
| 1372009_at                                                                              | tyrosyl-tRNA synthetase                                                                                               | Yars               | 2.64           | 0.0000           | 0.51                 | 0.0000           | 1.27                        | 0.0041           |
| 1370265_at                                                                              | arrestin, beta 2                                                                                                      | Arrb2              | 2.62           | 0.0000           | 0.40                 | 0.0000           | 1.19                        | 0.0401           |
| 1387871_at                                                                              | cofilin 1, non-muscle                                                                                                 | Cfl1               | 2.61           | 0.0000           | 0.67                 | 0.0013           | 1.03                        | 0.8569           |
| 1370346_at                                                                              | cyclin B1                                                                                                             | Ccnb1              | 2.60           | 0.0000           | 0.34                 | 0.0000           | 1.05                        | 0.6727           |
| 1370688_at                                                                              | glutamate-cysteine ligase, catalytic subunit                                                                          | Gclc               | 2.60           | 0.0000           | 0.88                 | 0.0912           | 0.92                        | 0.2948           |
| 1368973_at                                                                              | adenosine deaminase, RNA-specific                                                                                     | Adar               | 2.52           | 0.0000           | 0.36                 | 0.0000           | 1.26                        | 0.0066           |
| 1398756_at                                                                              | nucleophosmin 1 /// similar to Nucleophosmin (NPM) (Nucleolar phosphoprotein B23) (Numatrin) (Nucleolar protein NO38) | Npm1 /// LOC300303 | 2.45           | 0.0000           | 0.46                 | 0.0000           | 1.27                        | 0.0233           |
| 1374468_at                                                                              | myeloid differentiation primary response gene 88                                                                      | Myd88              | 2.38           | 0.0000           | 0.74                 | 0.0002           | 1.08                        | 0.2890           |

|            |                                                                                    |                |       |        |      |        |       |        |
|------------|------------------------------------------------------------------------------------|----------------|-------|--------|------|--------|-------|--------|
| 1369204_at | hemopoietic cell kinase                                                            | Hck            | 2.30  | 0.0000 | 0.49 | 0.0000 | 1.78  | 0.0000 |
| 1369688_at | protein tyrosine kinase 2 beta                                                     | Ptk2b          | 2.23  | 0.0000 | 0.77 | 0.0054 | 1.07  | 0.5298 |
| 1372601_at | activating transcription factor 5                                                  | Atf5           | 2.22  | 0.0000 | 0.36 | 0.0000 | 1.60  | 0.0001 |
| 1369104_at | protein kinase, AMP-activated, alpha 1 catalytic subunit                           | Prkaa1         | 2.18  | 0.0000 | 0.64 | 0.0058 | 1.13  | 0.4705 |
| 1387566_at | phospholipase A2, group IVA (cytosolic, calcium-dependent)                         | Pla2g4a        | 2.13  | 0.0000 | 0.74 | 0.0020 | 1.07  | 0.4977 |
| 1367943_at | nuclear factor of kappa light chain gene enhancer in B-cells inhibitor, beta       | Nfkbib         | 2.05  | 0.0000 | 0.73 | 0.0039 | 1.20  | 0.0832 |
| 1368482_at | B-cell leukemia/lymphoma 2 related protein A1                                      | Bcl2a1         | 2.02  | 0.0000 | 0.57 | 0.0000 | 1.56  | 0.0000 |
| 1370869_at | branched chain aminotransferase 1, cytosolic                                       | Bcat1          | 17.72 | 0.0000 | 0.32 | 0.0001 | 2.60  | 0.0008 |
| 1388792_at | growth arrest and DNA-damage-inducible 45 gamma                                    | Gadd45g        | 16.85 | 0.0000 | 0.72 | 0.0143 | 0.91  | 0.5561 |
| 1368683_at | oxidized low density lipoprotein (lectin-like) receptor 1                          | Oldlr1         | 15.78 | 0.0000 | 0.19 | 0.0000 | 2.55  | 0.0001 |
| 1370628_at | granzyme B                                                                         | Gzmb           | 12.93 | 0.0000 | 0.07 | 0.0000 | 3.89  | 0.0000 |
| 1387134_at | schlafen 3                                                                         | Slfn3          | 11.77 | 0.0000 | 0.16 | 0.0000 | 2.21  | 0.0000 |
| 1368017_at | lectin, galactose binding, soluble 7                                               | Lgals7         | 7.16  | 0.0000 | 0.13 | 0.0000 | 19.97 | 0.0000 |
| 1387818_at | caspase 4, apoptosis-related cysteine peptidase                                    | Casp4          | 7.08  | 0.0000 | 0.22 | 0.0000 | 1.33  | 0.0008 |
| 1369173_at | complement component 3a receptor 1                                                 | C3ar1          | 6.79  | 0.0000 | 0.14 | 0.0000 | 1.62  | 0.0007 |
| 1391384_at | tumor necrosis factor (TNF superfamily, member 2)                                  | Tnf            | 6.25  | 0.0000 | 0.44 | 0.0001 | 2.13  | 0.0004 |
| 1387242_at | Protein kinase, interferon-inducible double stranded RNA dependent                 | Prkr           | 6.25  | 0.0000 | 0.20 | 0.0000 | 1.67  | 0.0001 |
| 1370422_at | receptor-interacting serine-threonine kinase 3                                     | Ripk3          | 6.11  | 0.0000 | 0.30 | 0.0000 | 1.91  | 0.0001 |
| 1387011_at | lipocalin 2                                                                        | Lcn2           | 5.56  | 0.0000 | 0.39 | 0.0000 | 1.80  | 0.0000 |
| 1387221_at | GTP cyclohydrolase 1                                                               | Gch            | 4.74  | 0.0000 | 0.43 | 0.0000 | 1.36  | 0.0596 |
| 1398256_at | interleukin 1 beta                                                                 | Il1b           | 4.18  | 0.0000 | 0.76 | 0.0038 | 2.05  | 0.0000 |
| 1370096_at | perforin 1 (pore forming protein)                                                  | Prf1           | 4.08  | 0.0000 | 0.11 | 0.0000 | 2.39  | 0.0000 |
| 1368558_at | allograft inflammatory factor 1                                                    | Aif1           | 3.81  | 0.0000 | 0.28 | 0.0000 | 1.23  | 0.1029 |
| 1392731_at | hypothetical gene supported by NM_130426                                           | LOC497808      | 3.67  | 0.0000 | 0.52 | 0.0001 | 2.32  | 0.0000 |
| 1369182_at | coagulation factor III                                                             | F3             | 3.63  | 0.0000 | 0.65 | 0.0000 | 1.02  | 0.8569 |
| 1370928_at | LPS-induced TN factor                                                              | Litaf          | 3.41  | 0.0000 | 0.71 | 0.0001 | 1.40  | 0.0004 |
| 1368645_at | protein tyrosine phosphatase, non-receptor type 1                                  | Ptpn1          | 3.05  | 0.0000 | 0.63 | 0.0010 | 1.91  | 0.0001 |
| 1393280_at | lymphocyte antigen 86 (predicted)                                                  | Ly86_predicted | 2.91  | 0.0000 | 0.21 | 0.0000 | 1.69  | 0.0001 |
| 1369186_at | caspase 1                                                                          | Casp1          | 2.85  | 0.0000 | 0.36 | 0.0000 | 1.35  | 0.0008 |
| 1369590_at | DNA-damage inducible transcript 3                                                  | Ddit3          | 2.79  | 0.0000 | 0.23 | 0.0000 | 1.89  | 0.0000 |
| 1369683_at | BH3 interacting domain death agonist                                               | Bid            | 2.78  | 0.0000 | 0.50 | 0.0000 | 1.30  | 0.0216 |
| 1387591_at | interleukin 2 receptor, alpha chain                                                | Il2ra          | 2.75  | 0.0000 | 0.44 | 0.0003 | 1.11  | 0.6562 |
| 1376327_at | tumor necrosis factor receptor superfamily, member 14 (herpesvirus entry mediator) | Tnfrsf14       | 2.73  | 0.0000 | 0.50 | 0.0000 | 1.09  | 0.4992 |
| 1387605_at | caspase 12                                                                         | Casp12         | 2.68  | 0.0000 | 0.37 | 0.0000 | 1.16  | 0.0397 |
| 1368124_at | dual specificity phosphatase 5                                                     | Dusp5          | 2.59  | 0.0000 | 0.74 | 0.0610 | 1.11  | 0.5568 |
| 1387800_at | Fas death domain-associated protein                                                | Daxx           | 2.53  | 0.0000 | 0.35 | 0.0000 | 1.29  | 0.0016 |
| 1387394_at | interleukin 2 receptor, beta chain                                                 | Il2rb          | 2.45  | 0.0000 | 0.41 | 0.0000 | 1.09  | 0.5786 |
| 1388587_at | immediate early response 3                                                         | Ier3           | 2.34  | 0.0000 | 0.84 | 0.0054 | 0.87  | 0.0380 |
| 1387690_at | caspase 3, apoptosis related cysteine protease                                     | Casp3          | 2.27  | 0.0000 | 0.43 | 0.0000 | 1.41  | 0.0076 |
| 1370987_at | Sialophorin                                                                        | Spn            | 2.13  | 0.0000 | 0.47 | 0.0000 | 1.33  | 0.0027 |
| 1367715_at | tumor necrosis factor receptor superfamily, member 1a                              | Tnfrsf1a       | 2.13  | 0.0000 | 0.89 | 0.0934 | 1.16  | 0.0562 |
| 1368860_at | pleckstrin homology-like domain, family A, member 1                                | Phlda1         | 2.11  | 0.0000 | 0.75 | 0.0394 | 0.97  | 0.8625 |
| 1369003_at | death effector domain-containing                                                   | Dedd           | 2.06  | 0.0193 | 0.38 | 0.0045 | 1.57  | 0.1897 |
| 1388673_at | lymphocyte specific 1                                                              | Lsp1           | 2.05  | 0.0000 | 0.70 | 0.0038 | 1.22  | 0.1071 |
| 1367831_at | tumor protein p53                                                                  | Tp53           | 2.04  | 0.0000 | 0.60 | 0.0000 | 1.18  | 0.0471 |

| <b>GROUP IB GENES INCREASED IN SBR50 vs. SHAM AND UNCHANGED IN SBR50/IL-6 vs. SBR50</b>  |                                                                                                                    |                       |       |        |      |        |      |        |
|------------------------------------------------------------------------------------------|--------------------------------------------------------------------------------------------------------------------|-----------------------|-------|--------|------|--------|------|--------|
| 1368321_at                                                                               | early growth response 1                                                                                            | Egr1                  | 37.45 | 0.0000 | 1.19 | 0.1283 | 0.60 | 0.0004 |
| 1369268_at                                                                               | activating transcription factor 3                                                                                  | Atf3                  | 21.60 | 0.0000 | 0.94 | 0.7252 | 0.61 | 0.0086 |
| 1369584_at                                                                               | suppressor of cytokine signaling 3                                                                                 | Socs3                 | 12.91 | 0.0000 | 0.76 | 0.1088 | 0.91 | 0.6511 |
| 1369067_at                                                                               | nuclear receptor subfamily 4, group A, member 3                                                                    | Nr4a3                 | 12.73 | 0.0000 | 1.27 | 0.1229 | 1.60 | 0.0080 |
| 1386935_at                                                                               | nuclear receptor subfamily 4, group A, member 1                                                                    | Nr4a1                 | 7.42  | 0.0000 | 1.07 | 0.5943 | 0.85 | 0.2618 |
| 1367581_at                                                                               | secreted phosphoprotein 1                                                                                          | Spp1                  | 6.53  | 0.0000 | 1.25 | 0.4116 | 1.04 | 0.9000 |
| 1387391_at                                                                               | cyclin-dependent kinase inhibitor 1A                                                                               | Cdkn1a                | 5.63  | 0.0000 | 1.29 | 0.1249 | 0.87 | 0.4597 |
| 1387788_at                                                                               | Jun-B oncogene                                                                                                     | Junb                  | 5.09  | 0.0000 | 1.10 | 0.4755 | 1.02 | 0.9273 |
| 1369393_at                                                                               | mitogen-activated protein kinase kinase kinase 8                                                                   | Map3k8                | 4.30  | 0.0000 | 1.09 | 0.4965 | 1.08 | 0.5656 |
| 1368813_at                                                                               | CCAAT/enhancer binding protein (C/EBP), delta                                                                      | Cebpd                 | 3.51  | 0.0000 | 0.88 | 0.1907 | 1.25 | 0.0368 |
| 1370485_at                                                                               | Bcl2-like 1                                                                                                        | Bcl2l1                | 3.36  | 0.0000 | 1.22 | 0.1320 | 0.74 | 0.0418 |
| 1369006_at                                                                               | hexokinase 2                                                                                                       | Hk2                   | 3.05  | 0.0000 | 0.96 | 0.6906 | 0.95 | 0.6832 |
| 1387701_at                                                                               | hepatocyte growth factor                                                                                           | Hgf                   | 2.62  | 0.0011 | 1.46 | 0.1641 | 0.77 | 0.4033 |
| 1368174_at                                                                               | hypothetical gene supported by NM_019371                                                                           | LOC497816             | 2.13  | 0.0005 | 0.76 | 0.1601 | 0.89 | 0.6323 |
| 1370690_at                                                                               | heat shock 70kDa protein 9A (predicted)                                                                            | Hspa9a_predicted      | 2.09  | 0.0000 | 0.90 | 0.1088 | 0.78 | 0.0012 |
| 1387269_at                                                                               | <i>plasminogen activator, urokinase receptor</i>                                                                   | <i>Plaur</i>          | 4.87  | 0.0000 | 1.05 | 0.6948 | 1.00 | 0.9923 |
| 1387530_at                                                                               | <i>fos-like antigen 2 /// FBJ osteosarcoma oncogene B</i>                                                          | <i>Fosl2 /// Fosb</i> | 4.03  | 0.0000 | 0.91 | 0.5739 | 1.14 | 0.4597 |
| 1371785_at                                                                               | <i>tumor necrosis factor receptor superfamily, member 12a</i>                                                      | <i>Tnfrsf12a</i>      | 3.84  | 0.0000 | 0.89 | 0.5508 | 0.70 | 0.0840 |
| 1368947_at                                                                               | <i>growth arrest and DNA-damage-inducible 45 alpha</i>                                                             | <i>Gadd45a</i>        | 3.76  | 0.0000 | 0.94 | 0.5540 | 1.05 | 0.6442 |
| 1387868_at                                                                               | <i>lipopolysaccharide binding protein</i>                                                                          | <i>Lbp</i>            | 2.50  | 0.0000 | 0.92 | 0.2390 | 1.05 | 0.5411 |
| 1368748_at                                                                               | <i>testis-specific kinase 2</i>                                                                                    | <i>Tesk2</i>          | 2.31  | 0.0011 | 0.74 | 0.1985 | 1.22 | 0.4597 |
| <b>GROUP IIA GENES DECREASED IN SBR50 vs. SHAM AND INCREASED IN SBR50/IL-6 vs. SBR50</b> |                                                                                                                    |                       |       |        |      |        |      |        |
| 1369699_at                                                                               | glucagon-like peptide 1 receptor                                                                                   | Glp1r                 | 0.08  | 0.0000 | 9.71 | 0.0000 | 0.49 | 0.0010 |
| 1370114_at                                                                               | phosphatidylinositol 3-kinase, regulatory subunit, polypeptide 1                                                   | Pik3r1                | 0.18  | 0.0000 | 1.28 | 0.0456 | 0.67 | 0.0046 |
| 1367628_at                                                                               | lectin, galactose binding, soluble 1                                                                               | Lgals1                | 0.19  | 0.0000 | 4.48 | 0.0000 | 0.64 | 0.0000 |
| 1370864_at                                                                               | procollagen, type 1, alpha 1                                                                                       | Col1a1                | 0.25  | 0.0000 | 6.49 | 0.0000 | 0.92 | 0.7742 |
| 1370197_at                                                                               | protein kinase C, zeta                                                                                             | Prkcz                 | 0.29  | 0.0000 | 1.62 | 0.0002 | 0.75 | 0.0165 |
| 1387071_at                                                                               | microtubule-associated protein tau /// hypothetical gene supported by NM_017212                                    | Mapt /// LOC497674    | 0.30  | 0.0000 | 1.72 | 0.0000 | 1.22 | 0.0006 |
| 1368677_at                                                                               | brain derived neurotrophic factor                                                                                  | Bdnf                  | 0.30  | 0.0000 | 1.84 | 0.0020 | 0.48 | 0.0009 |
| 1368989_at                                                                               | tissue inhibitor of metalloproteinase 3 (Sorsby fundus dystrophy, pseudoinflammatory)                              | Timp3                 | 0.34  | 0.0000 | 2.45 | 0.0001 | 0.40 | 0.0001 |
| 1370427_at                                                                               | platelet derived growth factor, alpha                                                                              | Pdgfa                 | 0.34  | 0.0000 | 1.58 | 0.0000 | 0.87 | 0.0524 |
| 1376711_at                                                                               | claudin 11                                                                                                         | Cldn11                | 0.34  | 0.0000 | 1.43 | 0.0190 | 0.61 | 0.0038 |
| 1370583_at                                                                               | ATP-binding cassette, sub-family B (MDR/TAP), member 1 /// ATP-binding cassette, sub-family B (MDR/TAP), member 1A | Abcb1 /// Abcb1a      | 0.41  | 0.0000 | 1.52 | 0.0001 | 1.01 | 0.9021 |
| 1367823_at                                                                               | tissue inhibitor of metalloproteinase 2                                                                            | Timp2                 | 0.42  | 0.0000 | 1.95 | 0.0000 | 0.76 | 0.0119 |
| 1370333_at                                                                               | insulin-like growth factor 1                                                                                       | Igf1                  | 0.42  | 0.0000 | 2.16 | 0.0000 | 0.93 | 0.4114 |
| 1387971_at                                                                               | mitogen activated protein kinase 8 interacting protein                                                             | Mapk8ip               | 0.45  | 0.0000 | 1.85 | 0.0000 | 0.72 | 0.0080 |
| 1369654_at                                                                               | protein kinase, AMP-activated, alpha 2 catalytic subunit                                                           | Prkaa2                | 0.46  | 0.0000 | 1.81 | 0.0001 | 0.91 | 0.4677 |
| 1399098_at                                                                               | glyoxylase 1                                                                                                       | Glo1                  | 0.46  | 0.0000 | 1.93 | 0.0000 | 0.78 | 0.0014 |
| 1370331_at                                                                               | interleukin 11 receptor, alpha chain 1                                                                             | Il11ra1               | 0.46  | 0.0000 | 1.83 | 0.0000 | 0.82 | 0.0404 |
| 1387173_at                                                                               | chymase 1, mast cell                                                                                               | Cma1                  | 0.47  | 0.0011 | 2.62 | 0.0002 | 1.09 | 0.7451 |
| 1371668_at                                                                               | Retinoid X receptor alpha                                                                                          | Rxra                  | 0.47  | 0.0000 | 1.26 | 0.0223 | 1.07 | 0.5827 |
| 1370081_at                                                                               | vascular endothelial growth factor A                                                                               | Vegfa                 | 0.48  | 0.0000 | 1.65 | 0.0002 | 0.65 | 0.0016 |
| 1387771_at                                                                               | mitogen activated protein kinase 3                                                                                 | Mapk3                 | 0.48  | 0.0000 | 1.26 | 0.0047 | 0.86 | 0.0620 |
| 1387769_at                                                                               | inhibitor of DNA binding 3                                                                                         | Id3                   | 0.48  | 0.0000 | 1.50 | 0.0005 | 0.59 | 0.0001 |
| 1387232_at                                                                               | bone morphogenetic protein 4                                                                                       | Bmp4                  | 0.50  | 0.0000 | 1.44 | 0.0000 | 0.74 | 0.0000 |

|                                                                                          |                                                                          |                 |      |        |      |        |      |        |
|------------------------------------------------------------------------------------------|--------------------------------------------------------------------------|-----------------|------|--------|------|--------|------|--------|
| 1370100_at                                                                               | phosphatidylinositol 3-kinase, regulatory subunit, polypeptide 2         | Pik3r2          | 0.53 | 0.0000 | 1.39 | 0.0017 | 1.09 | 0.4116 |
| 1386862_at                                                                               | annexin A5                                                               | Anxa5           | 0.54 | 0.0000 | 1.53 | 0.0000 | 0.91 | 0.0970 |
| 1367771_at                                                                               | TSC22 domain family 3                                                    | Tsc22d3         | 0.55 | 0.0000 | 1.67 | 0.0000 | 1.06 | 0.1897 |
| 1387875_at                                                                               | PTK2 protein tyrosine kinase 2                                           | Ptk2            | 0.56 | 0.0000 | 1.13 | 0.0731 | 1.01 | 0.8568 |
| 1367651_at                                                                               | cathepsin D                                                              | Ctsd            | 0.56 | 0.0000 | 1.34 | 0.0000 | 0.89 | 0.0245 |
| 1376569_at                                                                               | Kruppel-like factor 2 (lung) (predicted)                                 | Klf2_predicted  | 0.56 | 0.0000 | 1.10 | 0.0109 | 1.08 | 0.0419 |
| 1370026_at                                                                               | crystallin, alpha B                                                      | Cryab           | 0.59 | 0.0000 | 2.48 | 0.0000 | 0.65 | 0.0001 |
| 1388459_at                                                                               | procollagen, type XVIII, alpha 1                                         | Col18a1         | 0.59 | 0.0001 | 1.76 | 0.0000 | 1.06 | 0.6296 |
| 1369159_at                                                                               | androgen receptor                                                        | Ar              | 0.60 | 0.0004 | 1.24 | 0.0953 | 0.74 | 0.0345 |
| 1367871_at                                                                               | cytochrome P450, family 2, subfamily e, polypeptide 1                    | Cyp2e1          | 0.12 | 0.0000 | 4.17 | 0.0000 | 0.48 | 0.0000 |
| 1372299_at                                                                               | cyclin-dependent kinase inhibitor 1C (P57)                               | Cdkn1c          | 0.21 | 0.0000 | 2.40 | 0.0000 | 0.85 | 0.1255 |
| 1368897_at                                                                               | MAD homolog 7 (Drosophila)                                               | Madh7           | 0.23 | 0.0000 | 1.42 | 0.0585 | 0.62 | 0.0202 |
| 1368120_at                                                                               | NEL-like 1 (chicken)                                                     | Nell1           | 0.24 | 0.0000 | 3.75 | 0.0000 | 0.56 | 0.0005 |
| 1388384_at                                                                               | Dynein light chain LC8-type 1                                            | Dynl1           | 0.25 | 0.0000 | 1.47 | 0.0139 | 0.81 | 0.1874 |
| 1368242_at                                                                               | potassium voltage gated channel, Shab-related subfamily, member 1        | Kcnb1           | 0.31 | 0.0000 | 2.02 | 0.0000 | 0.88 | 0.3317 |
| 1376285_at                                                                               | GULP, engulfment adaptor PTB domain containing 1                         | Gulp1           | 0.33 | 0.0000 | 1.76 | 0.0002 | 0.83 | 0.1662 |
| 1369373_at                                                                               | fibroblast growth factor receptor 3                                      | Fgfr3           | 0.34 | 0.0000 | 1.45 | 0.0117 | 0.66 | 0.0085 |
| 1388193_at                                                                               | huntingtin interacting protein 1                                         | Hip1            | 0.42 | 0.0000 | 1.25 | 0.0142 | 1.18 | 0.0887 |
| 1377064_at                                                                               | dual specificity phosphatase 6                                           | Dusp6           | 0.42 | 0.0000 | 1.38 | 0.0002 | 1.10 | 0.1928 |
| 1368863_at                                                                               | non-metastatic cell expressed protein 3                                  | Nme3            | 0.45 | 0.0000 | 1.82 | 0.0000 | 0.63 | 0.0005 |
| 1372423_at                                                                               | PERP, TP53 apoptosis effector (predicted)                                | Perp_predicted  | 0.46 | 0.0000 | 1.69 | 0.0000 | 0.82 | 0.0202 |
| 1370552_at                                                                               | protein phosphatase 1F (PP2C domain containing)                          | Ppm1f           | 0.46 | 0.0035 | 1.78 | 0.0270 | 0.61 | 0.0743 |
| 1370301_at                                                                               | matrix metalloproteinase 2                                               | Mmp2            | 0.46 | 0.0000 | 2.14 | 0.0000 | 0.93 | 0.3072 |
| 1376689_at                                                                               | similar to RIKEN cDNA 1700023M03                                         | RGD1305457      | 0.47 | 0.0000 | 1.47 | 0.0023 | 0.90 | 0.4230 |
| 1369407_at                                                                               | tumor necrosis factor receptor superfamily, member 11b (osteoprotegerin) | Tnfrsf11b       | 0.47 | 0.0000 | 2.08 | 0.0000 | 0.80 | 0.0883 |
| 1387022_at                                                                               | aldehyde dehydrogenase family 1, member A1                               | Aldh1a1         | 0.47 | 0.0000 | 1.76 | 0.0000 | 0.84 | 0.0407 |
| 1388718_at                                                                               | tropomodulin 1                                                           | Tmod1           | 0.49 | 0.0000 | 1.49 | 0.0001 | 0.90 | 0.2254 |
| 1388272_at                                                                               | immunoglobulin heavy chain 1a (serum IgG2a)                              | Igh-1a          | 0.51 | 0.0008 | 1.89 | 0.0020 | 1.08 | 0.7171 |
| 1372503_at                                                                               | tumor necrosis factor ligand superfamily member 12                       | Tnfsf12         | 0.53 | 0.0000 | 1.19 | 0.0335 | 0.88 | 0.1344 |
| 1390096_at                                                                               | SH3-domain GRB2-like B1 (endophilin)                                     | Sh3glb1         | 0.55 | 0.0000 | 1.40 | 0.0000 | 0.98 | 0.7369 |
| 1369179_at                                                                               | peroxisome proliferator activated receptor gamma                         | Pparg           | 0.56 | 0.0000 | 1.94 | 0.0000 | 0.59 | 0.0001 |
| 1370091_at                                                                               | guanine nucleotide binding protein, alpha q polypeptide                  | Gnaq            | 0.56 | 0.0014 | 1.61 | 0.0079 | 0.75 | 0.1143 |
| 1368403_at                                                                               | retinoblastoma-like 2                                                    | Rbl2            | 0.58 | 0.0000 | 1.33 | 0.0000 | 0.84 | 0.0024 |
| 1372330_at                                                                               | goliath                                                                  | LOC652955       | 0.59 | 0.0000 | 1.17 | 0.0130 | 0.96 | 0.5970 |
| 1386978_at                                                                               | BCL2/adenovirus E1B 19 kDa-interacting protein 3-like                    | Bnip3l          | 0.59 | 0.0000 | 1.30 | 0.0002 | 0.92 | 0.2008 |
| 1373479_at                                                                               | Protein phosphatase 3, catalytic subunit, alpha isoform                  | Ppp3ca          | 0.59 | 0.0000 | 1.20 | 0.0027 | 0.79 | 0.0006 |
| 1387957_at                                                                               | SH3-domain kinase binding protein 1                                      | Sh3kbp1         | 0.60 | 0.0000 | 1.49 | 0.0000 | 0.80 | 0.0026 |
| <b>GROUP IIB GENES DECREASED IN SBR50 vs. SHAM AND UNCHANGED IN SBR50/IL-6 vs. SBR50</b> |                                                                          |                 |      |        |      |        |      |        |
| 1368375_at                                                                               | interleukin 15                                                           | Il15            | 0.39 | 0.0000 | 1.12 | 0.4963 | 0.66 | 0.0202 |
| 1369816_at                                                                               | RAB3A, member RAS oncogene family                                        | Rab3a           | 0.52 | 0.0000 | 1.19 | 0.1708 | 0.76 | 0.0451 |
| 1368924_at                                                                               | growth hormone receptor                                                  | Ghr             | 0.53 | 0.0004 | 1.28 | 0.1220 | 0.89 | 0.5114 |
| 1376692_at                                                                               | homeodomain interacting protein kinase 2 (predicted)                     | Hipk2_predicted | 0.56 | 0.0006 | 1.05 | 0.7744 | 1.62 | 0.0063 |
| 1371819_at                                                                               | histone deacetylase 5                                                    | Hdac5           | 0.59 | 0.0000 | 1.05 | 0.5269 | 1.12 | 0.1559 |
| 1390627_at                                                                               | T-box 3                                                                  | Tbx3            | 0.33 | 0.0000 | 1.16 | 0.4537 | 0.89 | 0.5946 |
| 1368486_at                                                                               | insulin receptor substrate 3                                             | Irs3            | 0.40 | 0.0000 | 1.18 | 0.1039 | 1.13 | 0.2781 |
| 1369146_at                                                                               | aryl hydrocarbon receptor                                                | Ahr             | 0.44 | 0.0000 | 1.12 | 0.3783 | 0.86 | 0.2707 |

|                                                                                          |                                                                                                |                        |             |               |             |               |             |               |
|------------------------------------------------------------------------------------------|------------------------------------------------------------------------------------------------|------------------------|-------------|---------------|-------------|---------------|-------------|---------------|
| <i>1369115_at</i>                                                                        | <i>adrenergic receptor, beta 2</i>                                                             | <i>Adrb2</i>           | <i>0.54</i> | <i>0.0000</i> | <i>0.97</i> | <i>0.7842</i> | <i>1.08</i> | <i>0.5060</i> |
| <i>1368222_at</i>                                                                        | <i>nuclear receptor subfamily 3, group C, member 1</i>                                         | <i>Nr3c1</i>           | <i>0.54</i> | <i>0.0007</i> | <i>1.13</i> | <i>0.4802</i> | <i>0.81</i> | <i>0.2313</i> |
| <i>1387675_at</i>                                                                        | <i>plasminogen activator, urokinase</i>                                                        | <i>Plau</i>            | <i>0.55</i> | <i>0.0000</i> | <i>1.04</i> | <i>0.7279</i> | <i>0.94</i> | <i>0.5786</i> |
| <i>1389431_at</i>                                                                        | <i>protein kinase, DNA activated, catalytic polypeptide (predicted)</i>                        | <i>Prkdc_predicted</i> | <i>0.56</i> | <i>0.0000</i> | <i>1.07</i> | <i>0.4122</i> | <i>0.93</i> | <i>0.4116</i> |
| <i>1374786_at</i>                                                                        | <i>Cytotoxic granule-associated RNA binding protein 1</i>                                      | <i>Tial</i>            | <i>0.57</i> | <i>0.0013</i> | <i>1.26</i> | <i>0.1484</i> | <i>0.76</i> | <i>0.1164</i> |
| <i>1370443_at</i>                                                                        | <i>deoxyribonuclease II</i>                                                                    | <i>Dnase2</i>          | <i>0.59</i> | <i>0.0000</i> | <i>1.08</i> | <i>0.3836</i> | <i>0.93</i> | <i>0.4597</i> |
| <i>1368650_at</i>                                                                        | <i>Kruppel-like factor 10</i>                                                                  | <i>Klf10</i>           | <i>0.59</i> | <i>0.0000</i> | <i>1.04</i> | <i>0.5065</i> | <i>1.14</i> | <i>0.0524</i> |
| <b>GROUP III GENES INCREASED IN SBR50 vs. SHAM AND INCREASED IN SBR50/IL-6 vs. SBR50</b> |                                                                                                |                        |             |               |             |               |             |               |
| <i>1367555_at</i>                                                                        | Albumin                                                                                        | Alb                    | 3.87        | 0.0000        | 14.97       | 0.0000        | 1.52        | 0.0397        |
| <i>1368592_at</i>                                                                        | interleukin 1 alpha                                                                            | Il1a                   | 3.69        | 0.0000        | 1.47        | 0.0072        | 1.84        | 0.0004        |
| <i>1386995_at</i>                                                                        | B-cell translocation gene 2, anti-proliferative                                                | Btg2                   | 2.96        | 0.0000        | 1.34        | 0.0130        | 0.60        | 0.0004        |
| <i>1370989_at</i>                                                                        | ret proto-oncogene                                                                             | Ret                    | 2.36        | 0.0000        | 1.81        | 0.0002        | 1.15        | 0.3447        |
| <i>1389179_at</i>                                                                        | <i>cell death-inducing DNA fragmentation factor, alpha subunit-like effector A (predicted)</i> | <i>Cidea_predicted</i> | <i>3.96</i> | <i>0.0002</i> | <i>6.45</i> | <i>0.0000</i> | <i>0.28</i> | <i>0.0011</i> |
| <i>1398275_at</i>                                                                        | <i>matrix metalloproteinase 9</i>                                                              | <i>Mmp9</i>            | <i>2.53</i> | <i>0.0000</i> | <i>1.50</i> | <i>0.0049</i> | <i>1.08</i> | <i>0.6442</i> |
| <i>1387811_at</i>                                                                        | <i>angiotensinogen (serpin peptidase inhibitor, clade A, member 8)</i>                         | <i>Agt</i>             | <i>2.18</i> | <i>0.0012</i> | <i>3.61</i> | <i>0.0000</i> | <i>0.38</i> | <i>0.0007</i> |

\*Genes listed in regular type are anti-apoptotic, while genes listed in italics are pro-apoptotic.

+FDR: False discovery rate.
